# Supplementary material for: Conditioned serum in vitro treatment of chondrocyte pellets and osteoarthritic explants
Source: PubMed Central journal article supplement — Equine Vet J. 2022 Jun 6;55(2):325–35. doi: 10.1111/evj.13582 (PMC10084271; doi:10.1111/evj.13582), 2022-06-06
Supplement: EVJ-55-325-s001.pdf [file EVJ-55-325-s001.pdf]

**Table S4:** Gene expression in pellets treated with pooled serum (PS), pooled serum incubated for 24 h (PS24h), and pooled conditioned serum (PCS) compared with that in untreated controls (interleukin (IL)-1 $\beta$ -stimulated pellets) after 2 h. Genes are grouped based on significant expression in the treatment groups.

| Gene symbol                             | Gene name                                          | Probe set ID | PS Log2 FC | PS24h Log2 FC | PCS Log2 FC |
|-----------------------------------------|----------------------------------------------------|--------------|------------|---------------|-------------|
| <b>Upregulated in PS, PS24h and PCS</b> |                                                    |              |            |               |             |
| IL6                                     | interleukin 6 (interferon, beta 2)                 | 15077930     | 2.86       | 3.15          | 2.76        |
| NR4A2                                   | nuclear receptor subfamily 4, group A, member 2    | 15009307     | 2.65       | 2.02          | 2.94        |
| RGS2                                    | regulator of G-protein signaling 2, 24kDa          | 15073546     | 1.93       | 1.92          | 1.95        |
| LOC100062432                            | calcipressin-1-like                                | 15055245     | 1.42       | 1.38          | 1.31        |
| TBX3                                    | T-box 3                                            | 15114454     | 1.18       | 1.34          | 1.38        |
| LOC100065217                            | proto-oncogene c-Rel-like                          | 14992956     | 1.05       | 1.16          | 1.06        |
| <b>Upregulated in PS</b>                |                                                    |              |            |               |             |
| ---                                     | ---                                                | 15133646     | 1.12       | 0.31          | 0.51        |
| <b>Upregulated in PS24h</b>             |                                                    |              |            |               |             |
| LOC100068966                            | dual specificity protein phosphatase 5-like        | 14941768     | 1.25       | 1.70          | 1.40        |
| PRDM1                                   | PR domain containing 1, with ZNF domain            | 14952618     | 0.88       | 1.60          | 0.83        |
| UGCG                                    | UDP-glucose ceramide glucosyltransferase           | 15049158     | 0.97       | 1.50          | 0.88        |
| LOC100058506                            | tissue factor-like                                 | 15088044     | 0.64       | 1.02          | 0.56        |
| <b>Upregulated in PCS</b>               |                                                    |              |            |               |             |
| TIAM2                                   | T-cell lymphoma invasion and metastasis 2          | 15076014     | 0.75       | 0.75          | 1.01        |
| <b>Upregulated in PS and PS24h</b>      |                                                    |              |            |               |             |
| MID1                                    | midline 1 (Opitz/BBB syndrome)                     | 15130745     | 1.27       | 1.26          | 1.11        |
| <b>Upregulated in PS and PCS</b>        |                                                    |              |            |               |             |
| LOC100056470                            | uncharacterised LOC100056470                       | 15062489     | 1.45       | 0.94          | 1.66        |
| LOC100061353                            | nuclear receptor subfamily 4 group A member 1-like | 15097145     | 1.23       | 0.86          | 1.30        |
| LOC100059969                            | protein C-ets-2-like                               | 15054124     | 1.22       | 0.91          | 1.34        |
| <b>Upregulated in PS24h and PCS</b>     |                                                    |              |            |               |             |
| LOC100051514                            | regulator of G-protein signaling 16-like           | 15089848     | 0.91       | 1.55          | 1.53        |
| <b>Downregulated in PS24h and PCS</b>   |                                                    |              |            |               |             |
| LONRF3                                  | LON peptidase N-terminal domain and ring finger 3  | 15129681     | -0.85      | -1.11         | -1.04       |

---, probe set ID without known gene name
