# Supplementary material for: Conditioned serum in vitro treatment of chondrocyte pellets and osteoarthritic explants
Source: PubMed Central journal article supplement — Equine Vet J. 2022 Jun 6;55(2):325–35. doi: 10.1111/evj.13582 (PMC10084271; doi:10.1111/evj.13582), 2022-06-06
Supplement: EVJ-55-325-s002.pdf [file EVJ-55-325-s002.pdf]

**Table S2:** Significantly differentially expressed genes between unstimulated (culture media) and untreated controls (interleukin (IL)-1 $\beta$ -stimulated pellets) after 2 h.

| Probe Set ID | Gene Symbol      | Gene Description                                                 | Log2 FC (unstimulated controls compared to untreated controls (IL-1 $\beta$ -stimulated)) | Adjusted p-value |
|--------------|------------------|------------------------------------------------------------------|-------------------------------------------------------------------------------------------|------------------|
| 15078331     | LOC100070572     | actin-binding protein anillin-like                               | 4.48                                                                                      | 2.13E-07         |
| 15027210     | LOC100063021     | histone H2A type 1-like                                          | 4.47                                                                                      | 3.68E-06         |
| 14932458     | MKI67            | antigen identified by monoclonal antibody Ki-67                  | 4.39                                                                                      | 9.55E-07         |
| 14961376     | LOC100057162     | proline-rich protein 11-like                                     | 4.34                                                                                      | 2.19E-07         |
| 15074537     | ASPM             | asp (abnormal spindle) homolog, microcephaly associated (Dr      | 4.27                                                                                      | 7.44E-07         |
| 14944797     | PRC1             | protein regulator of cytokinesis 1                               | 4.23                                                                                      | 4.82E-07         |
| 14984908     | LOC100070798     | hyaluronan mediated motility receptor-like                       | 4.14                                                                                      | 6.89E-07         |
| 15024154     | ANGPTL7          | angiopoietin-like 7                                              | 4.04                                                                                      | 2.94E-11         |
| 14960493     | TOP2A            | topoisomerase (DNA) II alpha 170kDa                              | 4.04                                                                                      | 7.49E-07         |
| 15101914     | RACGAP1          | Rac GTPase activating protein 1                                  | 4.00                                                                                      | 3.92E-10         |
| 15090061     | CENPF            | centromere protein F, 350/400kDa (mitosin)                       | 3.98                                                                                      | 3.33E-07         |
| 15037163     | TPX2             | TPX2, microtubule-associated, homolog ( <i>Xenopus laevis</i> )  | 3.93                                                                                      | 2.97E-06         |
| 14932468     | MKI67            | antigen identified by monoclonal antibody Ki-67                  | 3.91                                                                                      | 2.73E-07         |
| 14946062     | KIF23            | kinesin family member 23                                         | 3.88                                                                                      | 6.40E-08         |
| 15058413     | GAS2L3           | growth arrest-specific 2 like 3                                  | 3.80                                                                                      | 1.45E-08         |
| 15066022     | ---              | ---                                                              | 3.80                                                                                      | 7.35E-07         |
| 14942647     | KIF11            | kinesin family member 11                                         | 3.77                                                                                      | 1.86E-07         |
| 15035043     | LOC100050093     | g2/mitotic-specific cyclin-B1-like                               | 3.76                                                                                      | 3.39E-07         |
| 15115854     | NDC80            | NDC80 kinetochore complex component homolog ( <i>S. cerevisi</i> | 3.65                                                                                      | 2.18E-07         |
| 15065998     | CENPE            | centromere protein E, 312kDa                                     | 3.60                                                                                      | 1.13E-06         |
| 15027216     | LOC100052889     | histone H2B type 1-N-like                                        | 3.58                                                                                      | 1.49E-07         |
| 15030125     | LOC100053065     | histone H3.1-like                                                | 3.53                                                                                      | 3.62E-06         |
| 15003089     | CKAP2            | cytoskeleton associated protein 2                                | 3.52                                                                                      | 8.88E-07         |
| 15065467     | LOC100069767     | centromere protein N-like                                        | 3.51                                                                                      | 6.90E-08         |
| 14947391     | CASC5            | cancer susceptibility candidate 5                                | 3.51                                                                                      | 2.05E-07         |
| 15101410     | NELL2            | NEL-like 2 (chicken)                                             | 3.50                                                                                      | 1.09E-11         |
| 15027118     | LOC100053156     | histone H2B type 1-B-like                                        | 3.48                                                                                      | 2.03E-05         |
| 15029648     | F13A1            | coagulation factor XIII, A1 polypeptide                          | 3.46                                                                                      | 2.30E-09         |
| 15090368     | NUF2             | NUF2, NDC80 kinetochore complex component, homolog ( <i>S.</i>   | 3.46                                                                                      | 1.86E-07         |
| 14985856     | KIF20A           | kinesin family member 20A                                        | 3.39                                                                                      | 2.76E-06         |
| 15017685     | LOC100057411     | stathmin-like                                                    | 3.33                                                                                      | 8.26E-07         |
| 15020878     | CCNA2            | cyclin A2                                                        | 3.28                                                                                      | 7.84E-07         |
| 14947311     | NUSAP1           | nucleolar and spindle associated protein 1                       | 3.27                                                                                      | 1.43E-06         |
| 15004827     | POSTN            | periostin, osteoblast specific factor                            | 3.25                                                                                      | 2.73E-06         |
| 15088754     | DEPDC1           | DEP domain containing 1                                          | 3.23                                                                                      | 1.13E-06         |
| 14946493     | CCNB2            | cyclin B2                                                        | 3.20                                                                                      | 7.49E-07         |
| 15011620     | ECT2             | epithelial cell transforming sequence 2 oncogene                 | 3.17                                                                                      | 7.44E-07         |
| 15030127     | LOC100053105     | histone H2A type 1-like                                          | 3.16                                                                                      | 4.75E-06         |
| 14947475     | BUB1B            | budding uninhibited by benzimidazoles 1 homolog beta (yeast      | 3.14                                                                                      | 1.88E-07         |
| 14939357     | ARHGAP11A        | Rho GTPase activating protein 11A                                | 3.12                                                                                      | 2.68E-06         |
| 14942597     | CEP55            | centrosomal protein 55kDa                                        | 3.09                                                                                      | 8.00E-07         |
| 15038211     | UBE2C            | ubiquitin-conjugating enzyme E2C                                 | 3.07                                                                                      | 5.52E-07         |
| 15091751     | LOC100059737     | histone H2B type 2-F-like                                        | 3.04                                                                                      | 4.69E-05         |
| 14998606     | MME              | membrane metallo-endopeptidase                                   | 3.04                                                                                      | 5.02E-09         |
| 14934268     | LOC100072299     | cyclin-dependent kinase 1-like                                   | 3.01                                                                                      | 1.40E-06         |
| 15068532     | SHCBP1           | SHC SH2-domain binding protein 1                                 | 2.97                                                                                      | 4.29E-07         |
| 15030212     | LOC100052624     | histone H2A type 1-like                                          | 2.96                                                                                      | 1.12E-06         |
| 15091737     | LOC100058378 //L | histone H3.2-like // histone H3.2-like // histone H3.2-like      | 2.95                                                                                      | 1.11E-05         |
| 14957727     | ---              | ---                                                              | 2.95                                                                                      | 7.84E-07         |
| 15030135     | ---              | ---                                                              | 2.92                                                                                      | 8.91E-07         |
| 15072200     | NCAPG            | non-SMC condensin I complex, subunit G                           | 2.89                                                                                      | 4.06E-06         |
| 14997705     | SGOL1            | shugoshin-like 1 ( <i>S. pombe</i> )                             | 2.89                                                                                      | 4.45E-06         |
| 15005311     | DIAPH3           | diaphanous homolog 3 ( <i>Drosophila</i> )                       | 2.88                                                                                      | 1.18E-08         |

|          |              |                                                                 |      |           |
|----------|--------------|-----------------------------------------------------------------|------|-----------|
| 15091753 | LOC100058378 | histone H3.2-like                                               | 2.85 | 1.31E-05  |
| 15076168 | LOC100063831 | NKG2D ligand 1-like                                             | 2.85 | 7.07E-05  |
| 14991902 | BUB1         | budding uninhibited by benzimidazoles 1 homolog (yeast)         | 2.79 | 2.37E-07  |
| 15021826 | KIF2C        | kinesin family member 2C                                        | 2.77 | 1.88E-07  |
| 15030147 | LOC100054378 | histone H3.1-like                                               | 2.73 | 1.56E-05  |
| 15048982 | SMC2         | structural maintenance of chromosomes 2                         | 2.71 | 2.25E-07  |
| 15132912 | CAPN6        | calpain 6                                                       | 2.69 | 2.03E-05  |
| 15100085 | LOC100052616 | cell division cycle-associated protein 3-like                   | 2.69 | 5.34E-08  |
| 15098415 | BARD1        | BRCA1 associated RING domain 1                                  | 2.68 | 4.97E-08  |
| 15019714 | CDCA2        | cell division cycle associated 2                                | 2.67 | 8.57E-08  |
| 15055175 | LOC100063599 | uncharacterized protein C21orf62-like                           | 2.67 | 1.20E-09  |
| 15025927 | PLK4         | polo-like kinase 4                                              | 2.65 | 2.38E-06  |
| 15017359 | FABP3        | fatty acid binding protein 3, muscle and heart (mammary-deri    | 2.64 | 6.05E-08  |
| 15044273 | LOC100056254 | cyclin-dependent kinase inhibitor 3-like                        | 2.64 | 1.12E-07  |
| 15065448 | LOC100055505 | c-type lectin domain family 3 member A-like                     | 2.63 | 0.0010641 |
| 15077718 | LOC100052612 | adseverin-like                                                  | 2.63 | 4.79E-07  |
| 15020929 | LOC100072353 | mitotic spindle assembly checkpoint protein MAD2A-like          | 2.62 | 7.47E-07  |
| 14983481 | LOC100629522 | neuronal protein 3.1-like                                       | 2.62 | 3.42E-11  |
| 15113175 | KIF18A       | kinesin family member 18A                                       | 2.61 | 7.24E-06  |
| 14964282 | BIRC5        | baculoviral IAP repeat containing 5                             | 2.60 | 2.14E-06  |
| 15016156 | STIL         | SCL/TAL1 interrupting locus                                     | 2.60 | 1.70E-08  |
| 15126382 | NCAPG2       | non-SMC condensin II complex, subunit G2                        | 2.57 | 2.13E-07  |
| 15090176 | DTL          | denticleless E3 ubiquitin protein ligase homolog (Drosophila)   | 2.55 | 8.24E-07  |
| 15112692 | LOC100055858 | lymphatic vessel endothelial hyaluronic acid receptor 1-like    | 2.55 | 1.44E-06  |
| 15027122 | LOC100053259 | histone H3.1-like                                               | 2.52 | 0.0001071 |
| 14944940 | FANCI        | Fanconi anemia, complementation group I                         | 2.50 | 7.80E-07  |
| 15037901 | LOC100070299 | protein FAM83D-like                                             | 2.50 | 1.86E-06  |
| 15132343 | ---          | ---                                                             | 2.48 | 1.56E-10  |
| 15000727 | KIF15        | kinesin family member 15                                        | 2.47 | 7.99E-09  |
| 14942784 | KIF20B       | kinesin family member 20B                                       | 2.46 | 5.21E-09  |
| 15128483 | ---          | ---                                                             | 2.44 | 3.13E-07  |
| 15074766 | LOC100063899 | ubiquitin-conjugating enzyme E2 T-like                          | 2.44 | 1.59E-06  |
| 14991781 | NCAPH        | non-SMC condensin I complex, subunit H                          | 2.42 | 2.11E-06  |
| 14952269 | TTK          | TTK protein kinase                                              | 2.40 | 4.72E-08  |
| 15116483 | LOC100069517 | spindle and kinetochore-associated protein 1-like               | 2.38 | 0.0071034 |
| 15130250 | LOC100069284 | high mobility group protein B3-like                             | 2.38 | 1.21E-06  |
| 14994507 | RRM2         | ribonucleotide reductase M2                                     | 2.37 | 8.58E-06  |
| 15033824 | C1QTNF3      | C1q and tumor necrosis factor related protein 3                 | 2.36 | 3.72E-09  |
| 15114903 | KNTC1        | kinetochore associated 1                                        | 2.35 | 1.39E-07  |
| 15134498 | ---          | ---                                                             | 2.35 | 9.27E-07  |
| 15030198 | LOC100147394 | histone H2A type 1-like                                         | 2.31 | 2.31E-05  |
| 14968625 | LOC100073050 | serine/threonine-protein kinase 12-like                         | 2.30 | 3.54E-06  |
| 15022062 | CDC20        | cell division cycle 20                                          | 2.30 | 5.03E-06  |
| 15087664 | SLC16A4      | solute carrier family 16, member 4 (monocarboxylic acid tran    | 2.29 | 1.01E-06  |
| 15084628 | SMC4         | structural maintenance of chromosomes 4                         | 2.28 | 3.39E-07  |
| 14999063 | FANCD2       | Fanconi anemia, complementation group D2                        | 2.26 | 3.87E-06  |
| 15030202 | LOC100052942 | histone H2A type 1-D-like                                       | 2.26 | 2.28E-05  |
| 15030149 | LOC100054424 | histone H2A type 1-D-like                                       | 2.25 | 0.0004841 |
| 15030196 | ---          | ---                                                             | 2.24 | 5.54E-06  |
| 15009774 | LOC100062715 | kinetochore protein Spc25-like                                  | 2.23 | 5.47E-06  |
| 15027141 | LOC100068222 | histone H2B type 1-like                                         | 2.20 | 0.0006828 |
| 15051277 | C25H9orf100  | chromosome 9 open reading frame 100 ortholog                    | 2.20 | 7.80E-07  |
| 14979614 | PLK1         | polo-like kinase 1                                              | 2.18 | 7.71E-07  |
| 15099796 | FOXM1        | forkhead box M1                                                 | 2.14 | 1.88E-07  |
| 15129074 | CENPI        | centromere protein I                                            | 2.13 | 2.09E-07  |
| 15089756 | TRIM59       | tripartite motif containing 59                                  | 2.12 | 2.09E-06  |
| 15024972 | LOC100060789 | lymphokine-activated killer T-cell-originated protein kinase-li | 2.12 | 0.000866  |
| 15048597 | MELK         | maternal embryonic leucine zipper kinase                        | 2.11 | 7.44E-07  |
| 15082993 | LOC100064880 | pleiotrophin-like                                               | 2.11 | 7.44E-07  |
| 15041344 | LOC100062623 | zinc finger protein 367-like                                    | 2.10 | 7.47E-07  |
| 15095449 | LOC100050852 | uncharacterized protein C12orf32-like                           | 2.09 | 1.80E-08  |
| 15030210 | LOC100052511 | histone H3.1-like                                               | 2.09 | 0.0008339 |
| 15085288 | NEK2         | NIMA (never in mitosis gene a)-related kinase 2                 | 2.08 | 2.44E-07  |
| 15033067 | ---          | ---                                                             | 2.08 | 1.25E-06  |

|          |                  |                                                                                  |      |           |
|----------|------------------|----------------------------------------------------------------------------------|------|-----------|
| 14984135 | GCNT4            | glucosaminyl (N-acetyl) transferase 4, core 2                                    | 2.07 | 0.0002596 |
| 15113085 | E2F8             | E2F transcription factor 8                                                       | 2.07 | 1.05E-05  |
| 14994348 | GEN1             | Gen endonuclease homolog 1 (Drosophila)                                          | 2.06 | 1.26E-06  |
| 15038045 | MYBL2            | v-myb myeloblastosis viral oncogene homolog (avian)-like 2                       | 2.06 | 8.45E-06  |
| 15019824 | ESCO2            | establishment of cohesion 1 homolog 2 (S. cerevisiae)                            | 2.06 | 6.47E-06  |
| 15076160 | LOC100063776     | uncharacterized LOC100063776                                                     | 2.04 | 5.97E-06  |
| 14947446 | LOC100071423     | putative TRAF4-associated factor 1-like                                          | 2.03 | 6.05E-08  |
| 15121168 | LOC100052149     | myb-related protein A-like                                                       | 2.02 | 4.49E-06  |
| 15101838 | LOC100059091     | tubulin alpha-1A chain-like                                                      | 2.02 | 2.73E-07  |
| 14983889 | HAPLN1           | hyaluronan and proteoglycan link protein 1                                       | 2.01 | 9.85E-06  |
| 15124460 | ATAD2            | ATPase family, AAA domain containing 2                                           | 2.01 | 1.88E-07  |
| 15120764 | MMP16            | matrix metalloproteinase 16 (membrane-inserted)                                  | 2.01 | 5.73E-10  |
| 15010499 | ZNF385B          | zinc finger protein 385B                                                         | 2.00 | 7.20E-06  |
| 15109872 | LOC100062824     | FXFD domain-containing ion transport regulator 6-like                            | 1.99 | 4.06E-06  |
| 15040911 | LOC100050161     | serine/threonine-protein kinase 6-like                                           | 1.99 | 7.24E-05  |
| 14955540 | LOC100063245     | cationic amino acid transporter 3-like                                           | 1.98 | 7.42E-06  |
| 15008028 | SGOL2            | shugoshin-like 2 (S. pombe)                                                      | 1.93 | 1.13E-06  |
| 15046735 | DLGAP5           | discs, large (Drosophila) homolog-associated protein 5                           | 1.93 | 0.0009217 |
| 14934097 | ACTA2            | actin, alpha 2, smooth muscle, aorta                                             | 1.91 | 0.0106297 |
| 15089190 | LOC100629703     | protein FAM72A-like                                                              | 1.89 | 0.0001198 |
| 15021075 | C4orf21          | chromosome 4 open reading frame 21                                               | 1.89 | 5.42E-06  |
| 15027145 | LOC100146811     | histone H3.1-like                                                                | 1.89 | 0.0003215 |
| 15027214 | LOC100052679 //L | histone H4-like // histone H4-like // histone H4-like // histone H4-like         | 1.89 | 0.0034201 |
| 14965576 | LOC100630218     | retina-specific copper amine oxidase-like                                        | 1.87 | 7.80E-07  |
| 15128808 | LOC100071749     | lysophosphatidic acid receptor 4-like                                            | 1.87 | 5.66E-06  |
| 14944988 | ACAN             | aggrecan                                                                         | 1.86 | 5.41E-05  |
| 15014360 | LEPREL1          | leprecan-like 1                                                                  | 1.86 | 3.87E-06  |
| 15124409 | DSCC1            | defective in sister chromatid cohesion 1 homolog (S. cerevisiae)                 | 1.84 | 9.66E-07  |
| 15088822 | LOC100069195     | UDP-N-acetylglucosamine/UDP-glucose/GDP-mannose transferase                      | 1.84 | 4.68E-08  |
| 14957724 | MTFR2            | mitochondrial fission regulator 2                                                | 1.83 | 3.65E-06  |
| 15123661 | MCM4             | minichromosome maintenance complex component 4                                   | 1.83 | 3.51E-05  |
| 15027218 | LOC100052624 //L | histone H2A type 1-like // histone H2A type 1-like // histone H2A type 1-like    | 1.81 | 4.65E-05  |
| 15122516 | ---              | ---                                                                              | 1.81 | 2.47E-05  |
| 14956480 | SRSF12           | serine/arginine-rich splicing factor 12                                          | 1.80 | 4.51E-06  |
| 15021566 | LOC100629771     | uncharacterized protein C1orf185 homolog                                         | 1.80 | 1.69E-06  |
| 15021113 | LOC100072829     | elongation of very long chain fatty acids protein 6-like                         | 1.80 | 1.51E-05  |
| 15002551 | LOC100050428     | gamma-sarcoglycan-like                                                           | 1.80 | 0.0001784 |
| 15027149 | LOC100052511 //L | histone H3.1-like // histone H3.1-like // histone H3.1-like // histone H3.1-like | 1.79 | 0.0023004 |
| 14965618 | LOC100630685     | receptor activity-modifying protein 2-like                                       | 1.78 | 2.38E-08  |
| 15101740 | LOC100058791     | peptidyl-prolyl cis-trans isomerase FKBP11-like                                  | 1.78 | 6.20E-06  |
| 14943083 | RTKN2            | rhotekin 2                                                                       | 1.78 | 5.24E-06  |
| 15007322 | ITGA6            | integrin, alpha 6                                                                | 1.77 | 0.0023624 |
| 15058310 | TMPO             | thymopoietin                                                                     | 1.77 | 1.96E-08  |
| 14994150 | LOC100055617     | histone H3-like centromeric protein A-like                                       | 1.76 | 4.40E-05  |
| 15008929 | LOC100055572     | DNA replication licensing factor MCM6-like                                       | 1.75 | 7.44E-07  |
| 15103647 | UHRF1            | ubiquitin-like with PHD and ring finger domains 1                                | 1.75 | 4.09E-06  |
| 15132405 | HMGN5            | high mobility group nucleosome binding domain 5                                  | 1.75 | 0.0006036 |
| 15107707 | WEE1             | WEE1 homolog (S. pombe)                                                          | 1.74 | 0.0059526 |
| 15030133 | LOC100053994     | histone H4-like                                                                  | 1.74 | 0.0005353 |
| 14937533 | LOC100053775     | PCNA-associated factor-like                                                      | 1.73 | 4.76E-06  |
| 15025249 | TLL1             | tolloid-like 1                                                                   | 1.72 | 3.14E-05  |
| 15030204 | LOC100062934     | histone H2B type 2-F-like                                                        | 1.72 | 7.03E-05  |
| 15074615 | KIF14            | kinesin family member 14                                                         | 1.72 | 1.30E-06  |
| 15058557 | LOC100053215     | PARP1-binding protein-like                                                       | 1.71 | 5.42E-06  |
| 14970161 | FAM111B          | family with sequence similarity 111, member B                                    | 1.70 | 2.26E-06  |
| 15099719 | B4GALNT3         | beta-1,4-N-acetyl-galactosaminyl transferase 3                                   | 1.70 | 2.70E-10  |
| 15027143 | LOC100053897     | histone H2A type 1-like                                                          | 1.70 | 0.0135509 |
| 15030139 | LOC100053847     | histone H2B type 1-like                                                          | 1.70 | 0.0052274 |
| 14967315 | SPAG5            | sperm associated antigen 5                                                       | 1.70 | 9.62E-05  |
| 14959248 | KPNA2            | karyopherin alpha 2 (RAG cohort 1, importin alpha 1)                             | 1.69 | 1.52E-05  |
| 15052323 | PHF19            | PHD finger protein 19                                                            | 1.69 | 8.70E-07  |
| 15086065 | IQGAP3           | IQ motif containing GTPase activating protein 3                                  | 1.68 | 5.09E-06  |
| 15048016 | SPI2             | alpha-1-antitrypsin                                                              | 1.68 | 0.0033686 |
| 15104639 | TAGLN            | transgelin                                                                       | 1.68 | 0.0029661 |

|          |                  |                                                                   |      |           |
|----------|------------------|-------------------------------------------------------------------|------|-----------|
| 15056268 | PDGFR            | platelet-derived growth factor receptor-like                      | 1.68 | 2.61E-06  |
| 14986286 | LMNB1            | lamin B1                                                          | 1.68 | 8.50E-06  |
| 15030206 | LOC100052783     | histone H3.1-like                                                 | 1.67 | 0.0024196 |
| 15074033 | EXO1             | exonuclease 1                                                     | 1.67 | 1.59E-06  |
| 15062229 | NEBL             | nebulette                                                         | 1.66 | 1.88E-07  |
| 15123161 | CRISPLD1         | cysteine-rich secretory protein LCCL domain containing 1          | 1.66 | 0.0053108 |
| 15093013 | LRRRC8C          | leucine rich repeat containing 8 family, member C                 | 1.66 | 1.95E-06  |
| 15058902 | MCM5             | minichromosome maintenance complex component 5                    | 1.65 | 9.04E-06  |
| 15114275 | CIT              | citron (rho-interacting, serine/threonine kinase 21)              | 1.65 | 0.0004651 |
| 14942491 | HELLS            | helicase, lymphoid-specific                                       | 1.64 | 5.10E-06  |
| 15087025 | LOC100058378     | histone H3.2-like                                                 | 1.63 | 0.011251  |
| 15013263 | LOC100061715     | protein CIP2A-like                                                | 1.61 | 5.88E-05  |
| 14943625 | KCNMA1           | potassium large conductance calcium-activated channel, subf       | 1.61 | 2.48E-05  |
| 14942529 | PLCE1            | phospholipase C, epsilon 1                                        | 1.60 | 2.16E-07  |
| 14991986 | CKAP2L           | cytoskeleton associated protein 2-like                            | 1.60 | 0.0001781 |
| 14982773 | CDC25C           | cell division cycle 25 homolog C (S. pombe)                       | 1.60 | 9.61E-05  |
| 15089905 | GLT25D2          | glycosyltransferase 25 domain containing 2                        | 1.60 | 5.61E-05  |
| 14957581 | MOXD1            | monooxygenase, DBH-like 1                                         | 1.59 | 0.0010712 |
| 15021265 | LOC100066893     | long-chain specific acyl-CoA dehydrogenase, mitochondrial-li      | 1.59 | 1.77E-07  |
| 15072714 | WHSC1            | Wolf-Hirschhorn syndrome candidate 1                              | 1.59 | 5.98E-07  |
| 15032357 | LOC100057208     | collagen alpha-1(IX) chain-like                                   | 1.59 | 3.70E-06  |
| 15032036 | MCM3             | minichromosome maintenance complex component 3                    | 1.58 | 3.14E-06  |
| 15062157 | LOC100065929     | phosphoribosyltransferase domain-containing protein 1-like        | 1.58 | 0.000152  |
| 14985066 | LOC100059936     | delta-sarcoglycan-like                                            | 1.58 | 5.48E-06  |
| 14958375 | LOC100057908     | thymidine kinase, cytosolic-like                                  | 1.57 | 2.32E-08  |
| 15112316 | LOC100069918     | protein kinase C delta-binding protein-like                       | 1.57 | 2.29E-05  |
| 15066141 | H2AFZ            | H2A histone family, member Z                                      | 1.57 | 8.64E-05  |
| 15019995 | LOC100061126     | scrapie-responsive protein 1-like                                 | 1.56 | 0.0084964 |
| 15132747 | ---              | ---                                                               | 1.55 | 1.01E-06  |
| 15030131 | LOC100053279 //L | histone H2B type 1-K-like // histone H2B type 1-K-like            | 1.55 | 0.0002522 |
| 15062095 | MASTL            | microtubule associated serine/threonine kinase-like               | 1.55 | 3.21E-05  |
| 15113149 | LGR4             | leucine-rich repeat containing G protein-coupled receptor 4       | 1.55 | 1.43E-07  |
| 15083433 | EZH2             | enhancer of zeste homolog 2 (Drosophila)                          | 1.54 | 1.01E-06  |
| 15087959 | SASS6            | spindle assembly 6 homolog (C. elegans)                           | 1.54 | 0.0001951 |
| 15068271 | LOC100070406     | probable serine protease HTRA3-like                               | 1.53 | 6.02E-05  |
| 15030167 | LOC100053279 //L | histone H2B type 1-K-like // histone H2B type 1-K-like // histo   | 1.52 | 3.38E-05  |
| 15092069 | SYCP1            | synaptonemal complex protein 1                                    | 1.52 | 5.40E-05  |
| 14966641 | LOC100629882     | spindle and kinetochore-associated protein 2-like                 | 1.51 | 1.03E-06  |
| 15030137 | LOC100054041     | histone H2A type 1-D-like                                         | 1.51 | 0.0049414 |
| 15102858 | PRIM1            | primase, DNA, polypeptide 1 (49kDa)                               | 1.50 | 1.45E-05  |
| 15027139 | LOC100053279 //L | histone H2B type 1-K-like // histone H2B type 1-K-like // histone | 1.50 | 0.0002234 |
| 15073097 | LOC100058310     | protein lin-9 homolog                                             | 1.49 | 6.37E-06  |
| 15132116 | ERCC6L           | excision repair cross-complementing rodent repair deficiency      | 1.49 | 4.81E-06  |
| 15060007 | LOC100050683     | protein lin-7 homolog A-like                                      | 1.49 | 3.41E-07  |
| 15069324 | LOC100053509     | centromere protein T-like                                         | 1.49 | 4.28E-09  |
| 15005285 | LECT1            | leukocyte cell derived chemotaxin 1                               | 1.48 | 0.0091019 |
| 15058996 | LOC100069841     | galectin-1-like                                                   | 1.48 | 0.0023392 |
| 15095563 | LOC100059512     | CD9 antigen-like                                                  | 1.48 | 5.52E-07  |
| 14988094 | MGAT4A           | mannosyl (alpha-1,3-)-glycoprotein beta-1,4-N-acetylglucosar      | 1.47 | 4.61E-06  |
| 15109741 | CADM1            | cell adhesion molecule 1                                          | 1.47 | 4.76E-08  |
| 15022452 | LOC100054646     | borealin-like                                                     | 1.47 | 0.0001041 |
| 15027153 | LOC100054236     | histone H4-like                                                   | 1.47 | 0.0130508 |
| 15131515 | SLC9A7           | solute carrier family 9, subfamily A (NHE7, cation proton anti    | 1.47 | 3.61E-05  |
| 15129618 | DOCK11           | dedicator of cytokinesis 11                                       | 1.46 | 3.89E-08  |
| 15002855 | BRCA2            | breast cancer 2, early onset                                      | 1.46 | 1.88E-07  |
| 14985920 | LOC100072674     | transforming growth factor-beta-induced protein ig-h3-like        | 1.45 | 5.69E-05  |
| 15096839 | TUBA1C           | tubulin, alpha 1c                                                 | 1.45 | 0.0002596 |
| 15029485 | KCNQ5            | potassium voltage-gated channel, KQT-like subfamily, member       | 1.45 | 0.0002842 |
| 15101460 | SLC38A1          | solute carrier family 38, member 1                                | 1.44 | 0.0001832 |
| 15027212 | LOC100053279     | histone H2B type 1-K-like                                         | 1.44 | 0.0002745 |
| 15102871 | ---              | ---                                                               | 1.43 | 0.0003226 |
| 15067694 | UGDH             | UDP-glucose 6-dehydrogenase                                       | 1.43 | 4.69E-07  |
| 14997696 | ZNF385D          | zinc finger protein 385D                                          | 1.43 | 1.04E-05  |
| 15094688 | LOC100064788     | EF-hand domain-containing protein D1-like                         | 1.43 | 0.0118188 |

|          |                  |                                                                  |      |           |
|----------|------------------|------------------------------------------------------------------|------|-----------|
| 14961536 | LOC100071185     | Fanconi anemia group J protein-like                              | 1.43 | 0.0001073 |
| 14958766 | LOC100059961     | hematological and neurological expressed 1 protein-like          | 1.43 | 1.74E-06  |
| 14987568 | LOC100065720     | microtubule-associated protein 1B-like                           | 1.42 | 3.89E-07  |
| 15055076 | LOC100063964     | protein Mis18-alpha-like                                         | 1.42 | 5.84E-06  |
| 15130082 | FHL1             | four and a half LIM domains 1                                    | 1.42 | 0.0007885 |
| 15013861 | LOC100063992     | 60S ribosomal protein L22-like 1-like                            | 1.42 | 5.39E-05  |
| 15089522 | CENPL            | centromere protein L                                             | 1.42 | 0.0010285 |
| 14968944 | PMP22            | peripheral myelin protein 22                                     | 1.42 | 0.0002161 |
| 14981991 | LOC100630177     | t-cell immunoglobulin and mucin domain-containing protein        | 1.41 | 0.0062866 |
| 15070860 | LOC100059394     | annexin A3-like                                                  | 1.41 | 0.0001514 |
| 14996896 | CSPG5            | chondroitin sulfate proteoglycan 5 (neuroglycan C)               | 1.40 | 2.24E-05  |
| 15134554 | ---              | ---                                                              | 1.40 | 0.0010077 |
| 15083077 | LOC100066648     | UPF0606 protein KIAA1549-like                                    | 1.40 | 9.72E-06  |
| 15131238 | ---              | ---                                                              | 1.40 | 3.74E-05  |
| 15088442 | MCOLN2           | mucoilin 2                                                       | 1.39 | 1.44E-06  |
| 15030141 | LOC100054193     | histone H2B type 2-F-like                                        | 1.39 | 0.0035862 |
| 15132674 | LOC100060746     | armadillo repeat-containing X-linked protein 2-like              | 1.39 | 1.01E-06  |
| 15075217 | SMOC2            | SPARC related modular calcium binding 2                          | 1.39 | 2.29E-05  |
| 15123100 | LOC100057538     | fatty acid-binding protein, epidermal-like                       | 1.39 | 0.0012342 |
| 15011413 | TIPARP           | TCDD-inducible poly(ADP-ribose) polymerase                       | 1.39 | 5.23E-05  |
| 15106952 | CHRDL2           | chordin-like 2                                                   | 1.39 | 1.73E-05  |
| 15015428 | COL8A1           | collagen, type VIII, alpha 1                                     | 1.38 | 0.0004879 |
| 14950926 | LOC100050794     | epithelial membrane protein 3-like                               | 1.38 | 4.31E-05  |
| 15027199 | LOC100052624 //L | histone H2A type 1-like // histone H2A type 1-like // histone H  | 1.38 | 0.000787  |
| 14984805 | CCDC99           | spindle apparatus coiled-coil protein 1                          | 1.38 | 0.000152  |
| 14951156 | RCN3             | reticulocalbin 3, EF-hand calcium binding domain                 | 1.38 | 1.83E-05  |
| 15087070 | ITGA10           | integrin, alpha 10                                               | 1.38 | 2.63E-05  |
| 14979712 | ERI2             | ERI1 exoribonuclease family member 2                             | 1.37 | 2.73E-05  |
| 14996585 | MIR191           | microRNA mir-191                                                 | 1.37 | 0.0001143 |
| 15027201 | LOC100052679 //L | histone H4-like // histone H4-like // histone H4-like // histone | 1.37 | 0.0020823 |
| 15019999 | LOC100061162     | high mobility group protein B2-like                              | 1.36 | 9.06E-09  |
| 15025551 | LOC100070074     | meiotic nuclear division protein 1 homolog                       | 1.36 | 6.06E-06  |
| 14933592 | LOXL4            | lysyl oxidase-like 4                                             | 1.36 | 1.25E-06  |
| 15002234 | LOC100050742     | transmembrane 4 L6 family member 1-like                          | 1.35 | 3.44E-05  |
| 14945363 | ATP10A           | ATPase, class V, type 10A                                        | 1.35 | 4.33E-07  |
| 15075897 | THBS2            | thrombospondin 2                                                 | 1.35 | 0.0003009 |
| 15107038 | LOC100052144     | mitochondrial uncoupling protein 2-like                          | 1.35 | 1.90E-06  |
| 14944575 | IL16             | interleukin 16                                                   | 1.35 | 0.0002599 |
| 14973812 | LOC100057522     | ribonuclease H2 subunit C-like                                   | 1.35 | 4.13E-05  |
| 14990510 | LOC100055408     | cell growth regulator with EF hand domain protein 1-like         | 1.35 | 0.0002172 |
| 14962447 | ---              | ---                                                              | 1.35 | 9.96E-05  |
| 14932572 | OAT              | ornithine aminotransferase                                       | 1.34 | 3.14E-06  |
| 15036246 | TRIP13           | thyroid hormone receptor interactor 13                           | 1.34 | 0.0008502 |
| 15012897 | POLQ             | polymerase (DNA directed), theta                                 | 1.34 | 9.63E-05  |
| 15024789 | LOC100146676     | receptor expression-enhancing protein 4-like                     | 1.34 | 0.0001228 |
| 14948833 | MIS18BP1         | MIS18 binding protein 1                                          | 1.34 | 8.25E-05  |
| 15014311 | RFC4             | replication factor C (activator 1) 4, 37kDa                      | 1.33 | 0.0001805 |
| 15027982 | KIFC1            | kinesin family member C1                                         | 1.33 | 2.05E-06  |
| 15038823 | LOC100058964     | solute carrier family 17 member 9-like                           | 1.32 | 4.75E-06  |
| 15035034 | LOC100055887     | centromere protein H-like                                        | 1.32 | 5.08E-05  |
| 15081535 | PDK4             | pyruvate dehydrogenase kinase, isozyme 4                         | 1.32 | 0.0334962 |
| 15004420 | SKA3             | spindle and kinetochore associated complex subunit 3             | 1.31 | 7.03E-05  |
| 15095610 | NCAPD2           | non-SMC condensin I complex, subunit D2                          | 1.31 | 1.04E-05  |
| 14998436 | LOC100059005     | type-1 angiotensin II receptor-like                              | 1.31 | 0.0088696 |
| 14996027 | NT5DC2           | 5'-nucleotidase domain containing 2                              | 1.30 | 9.66E-07  |
| 14979908 | LOC100034059     | exonuclease NEF-sp                                               | 1.30 | 6.40E-06  |
| 14942909 | PAPSS2           | 3'-phosphoadenosine 5'-phosphosulfate synthase 2                 | 1.30 | 0.0001329 |
| 14988421 | LOC100051931     | fibulin-7-like                                                   | 1.30 | 0.000583  |
| 15066229 | UNC5C            | unc-5 homolog C (C. elegans)                                     | 1.29 | 0.0016772 |
| 15099258 | HJURP            | Holliday junction recognition protein                            | 1.29 | 8.89E-05  |
| 14950206 | LOC100068274     | u1 small nuclear ribonucleoprotein A-like                        | 1.29 | 4.53E-06  |
| 15020022 | ---              | ---                                                              | 1.29 | 0.0015191 |
| 15068089 | LOC100056091     | heparan sulfate glucosamine 3-O-sulfotransferase 1-like          | 1.29 | 5.02E-05  |
| 15030151 | LOC100054521     | histone H4-like                                                  | 1.28 | 0.0043007 |

|          |              |                                                                                  |      |           |
|----------|--------------|----------------------------------------------------------------------------------|------|-----------|
| 14956680 | LOC100066022 | protein MMS22-like                                                               | 1.28 | 0.0017401 |
| 15075346 | LOC100062649 | f-box only protein 5-like                                                        | 1.28 | 0.0120097 |
| 15030208 | LOC100052679 | histone H4-like                                                                  | 1.27 | 0.0027432 |
| 15067748 | TLR1         | toll-like receptor 1                                                             | 1.27 | 0.0064722 |
| 14967406 | LOC100059417 | TLC domain-containing protein 1-like                                             | 1.27 | 8.55E-06  |
| 15016982 | CLSPN        | claspin                                                                          | 1.27 | 0.0003001 |
| 15003588 | LOC100065875 | protein aurora borealis-like                                                     | 1.27 | 3.61E-05  |
| 15034068 | ANKH         | ankylosis, progressive homolog (mouse)                                           | 1.27 | 3.95E-07  |
| 14944916 | TICRR        | TOPBP1-interacting checkpoint and replication regulator                          | 1.26 | 2.61E-05  |
| 15118310 | ---          | ---                                                                              | 1.26 | 8.45E-05  |
| 15134766 | ---          | ---                                                                              | 1.26 | 0.0002778 |
| 15090174 | ---          | ---                                                                              | 1.26 | 0.0146903 |
| 14973724 | LOC100050887 | sororin-like                                                                     | 1.26 | 0.0005426 |
| 15025502 | LOC100069704 | lecithin retinol acyltransferase-like                                            | 1.26 | 0.0240079 |
| 15031054 | COL11A2      | collagen, type XI, alpha 2                                                       | 1.25 | 0.0015103 |
| 15131595 | LOC100051531 | sodium-coupled neutral amino acid transporter 5-like                             | 1.25 | 5.57E-05  |
| 15121868 | MATN2        | matrilin 2                                                                       | 1.25 | 0.0159417 |
| 14993587 | LTBP1        | latent transforming growth factor beta binding protein 1                         | 1.25 | 3.66E-05  |
| 14945210 | ---          | ---                                                                              | 1.25 | 0.0002617 |
| 15026446 | SGMS2        | sphingomyelin synthase 2                                                         | 1.25 | 0.0009757 |
| 15124355 | TNFRSF11B    | tumor necrosis factor receptor superfamily, member 11b                           | 1.25 | 0.0118188 |
| 15078045 | LOC100068610 | sorting nexin-10-like                                                            | 1.24 | 3.29E-05  |
| 15017799 | LOC100057723 | UDP-glucose 4-epimerase-like                                                     | 1.23 | 7.41E-05  |
| 15018644 | LOC100056730 | spermidine synthase-like                                                         | 1.23 | 0.0030115 |
| 14958018 | LOC100049879 | pyrroline-5-carboxylate reductase 1, mitochondrial-like                          | 1.23 | 0.0039001 |
| 15047459 | LOC100058058 | probable ergosterol biosynthetic protein 28-like                                 | 1.23 | 3.19E-05  |
| 15087016 | LOC100054253 | histone H2A type 2-B-like                                                        | 1.23 | 0.0005249 |
| 15037709 | LOC100055199 | myosin regulatory light chain 2, smooth muscle major isoform                     | 1.23 | 0.006282  |
| 15076439 | GPR126       | G protein-coupled receptor 126                                                   | 1.23 | 2.03E-05  |
| 15045318 | LOC100051632 | proto-oncogene c-Fos-like                                                        | 1.22 | 0.0093553 |
| 15027120 | LOC100053206 | histone H2A type 1-E-like                                                        | 1.22 | 0.0003365 |
| 15060207 | LOC100051709 | epiphycan-like                                                                   | 1.22 | 0.0168858 |
| 15033151 | DEPDC1B      | DEP domain containing 1B                                                         | 1.22 | 0.0001552 |
| 15020024 | MFAP3L       | microfibrillar-associated protein 3-like                                         | 1.21 | 0.0247897 |
| 14936844 | CSPG4        | chondroitin sulfate proteoglycan 4                                               | 1.21 | 0.0009192 |
| 15052648 | ANGPTL2      | angiopoietin-like 2                                                              | 1.21 | 0.0004279 |
| 15005929 | EFNB2        | ephrin-B2                                                                        | 1.21 | 0.0164694 |
| 15014926 | LOC100070985 | phospholipase A1 member A-like                                                   | 1.21 | 0.0050924 |
| 14998311 | ACPL2        | acid phosphatase-like 2                                                          | 1.20 | 3.21E-06  |
| 15021570 | LOC100051195 | cyclin-dependent kinase 4 inhibitor C-like                                       | 1.20 | 1.04E-07  |
| 15072753 | TACC3        | transforming, acidic coiled-coil containing protein 3                            | 1.20 | 0.000152  |
| 14981678 | STC2         | stanniocalcin 2                                                                  | 1.20 | 0.0001399 |
| 15109502 | LOC100069666 | solute carrier family 35 member F2-like                                          | 1.20 | 0.0043992 |
| 15045332 | LOC100058017 | feline leukemia virus subgroup C receptor-related protein 2-like                 | 1.20 | 0.0009811 |
| 15091893 | PHGDH        | phosphoglycerate dehydrogenase                                                   | 1.19 | 0.0003749 |
| 15099538 | LOC100067824 | thymidylate kinase-like                                                          | 1.19 | 0.0002596 |
| 15006858 | GALNT5       | UDP-N-acetyl-alpha-D-galactosamine:polypeptide N-acetylglucosaminyltransferase 5 | 1.19 | 0.0050086 |
| 15030165 | LOC100053472 | histone H2B type 1-J-like                                                        | 1.19 | 0.0005726 |
| 15086341 | THBS3        | thrombospondin 3                                                                 | 1.19 | 7.50E-05  |
| 14997490 | SUSD5        | sushi domain containing 5                                                        | 1.19 | 0.0001416 |
| 14946221 | ZWILCH       | Zwilch, kinetochore associated, homolog (Drosophila)                             | 1.18 | 0.0035862 |
| 15097636 | ESYT1        | extended synaptotagmin-like protein 1                                            | 1.18 | 0.0005171 |
| 14987727 | LOC100061573 | ---                                                                              | 1.18 | 0.0012402 |
| 14942975 | LOC100072070 | ZW10 interactor-like                                                             | 1.18 | 0.000484  |
| 15015733 | DHCR24       | 24-dehydrocholesterol reductase                                                  | 1.18 | 0.0012168 |
| 15063510 | MCM10        | minichromosome maintenance complex component 10                                  | 1.18 | 0.0005812 |
| 15031410 | MDGA1        | MAM domain containing glycosylphosphatidylinositol anchor                        | 1.17 | 0.0364814 |
| 15024846 | LOC100058083 | lysyl oxidase homolog 2-like                                                     | 1.17 | 3.94E-06  |
| 15059655 | GTSE1        | G-2 and S-phase expressed 1                                                      | 1.16 | 3.91E-05  |
| 14948842 | ---          | ---                                                                              | 1.16 | 0.0001281 |
| 15105433 | LOC100064444 | hydrolethals syndrome protein 1-like                                             | 1.16 | 0.0006375 |
| 15133050 | LOC100058639 | septin-6-like                                                                    | 1.16 | 1.08E-05  |
| 14965791 | CDC6         | cell division cycle 6 homolog (S. cerevisiae)                                    | 1.16 | 0.000532  |
| 15047603 | ---          | ---                                                                              | 1.16 | 0.0013618 |

|          |              |                                                                |      |           |
|----------|--------------|----------------------------------------------------------------|------|-----------|
| 15124687 | KCNQ3        | potassium voltage-gated channel, KQT-like subfamily, member    | 1.15 | 0.0011879 |
| 15069755 | LOC100068994 | carbohydrate sulfotransferase 6-like                           | 1.15 | 3.81E-05  |
| 14992827 | LOC100063163 | neutral amino acid transporter A-like                          | 1.15 | 0.0045561 |
| 14966646 | MIR454       | microRNA mir-454                                               | 1.15 | 0.0050086 |
| 15052202 | TNC          | tenascin C                                                     | 1.15 | 0.000866  |
| 15125419 | CDC45        | cell division cycle 45 homolog (S. cerevisiae)                 | 1.14 | 0.0003861 |
| 15037507 | ACSS2        | acyl-CoA synthetase short-chain family member 2                | 1.14 | 5.41E-05  |
| 14937898 | LOC100068954 | meiosis-specific nuclear structural protein 1-like             | 1.14 | 8.92E-05  |
| 14935045 | LOC100630551 | uncharacterized LOC100630551                                   | 1.14 | 0.0001375 |
| 15057594 | NEIL3        | nei endonuclease VIII-like 3 (E. coli)                         | 1.14 | 0.0001507 |
| 15120906 | LOC100058549 | hairy/enhancer-of-split related with YRPW motif protein 1-like | 1.13 | 0.0001258 |
| 15133137 | LOC100055183 | c1GALT1-specific chaperone 1-like                              | 1.13 | 0.0049981 |
| 14951600 | LOC100062591 | myeloid-associated differentiation marker-like                 | 1.13 | 0.0011975 |
| 14965457 | G6PC3        | glucose 6 phosphatase, catalytic, 3                            | 1.13 | 0.0020812 |
| 14980626 | LOC100068378 | cyclin-F-like                                                  | 1.13 | 0.0002135 |
| 15019198 | LOC100147495 | matrix-remodeling-associated protein 8-like                    | 1.13 | 0.006066  |
| 15043082 | ---          | ---                                                            | 1.13 | 4.81E-05  |
| 15009627 | COBL1        | COBL-like 1                                                    | 1.12 | 0.0130508 |
| 15056706 | CSGALNACT1   | chondroitin sulfate N-acetylgalactosaminyltransferase 1        | 1.12 | 0.0011975 |
| 15029938 | MBOAT1       | membrane bound O-acyltransferase domain containing 1           | 1.12 | 0.0053108 |
| 15091741 | LOC100061573 | ---                                                            | 1.12 | 0.0025505 |
| 15100800 | RECQL        | RecQ protein-like (DNA helicase Q1-like)                       | 1.12 | 0.0002816 |
| 14948884 | LOC100065785 | DNA polymerase epsilon subunit 2-like                          | 1.12 | 7.85E-05  |
| 15128337 | MSN          | moesin                                                         | 1.12 | 1.41E-05  |
| 14968187 | LOC100060987 | protein MIS12 homolog                                          | 1.12 | 0.0031224 |
| 14952379 | NTSE         | 5'-nucleotidase, ecto (CD73)                                   | 1.11 | 0.0053108 |
| 15047107 | LOC100053070 | alpha-actinin-1-like                                           | 1.11 | 7.48E-06  |
| 15055305 | ERG          | v-ets erythroblastosis virus E26 oncogene homolog (avian)      | 1.10 | 0.000198  |
| 15094718 | ECA.9094     | ---                                                            | 1.10 | 9.69E-05  |
| 14952352 | PRSS35       | protease, serine, 35                                           | 1.10 | 3.67E-06  |
| 15081344 | LOC100050921 | lanosterol 14-alpha demethylase-like                           | 1.10 | 1.45E-05  |
| 15045865 | ---          | ---                                                            | 1.10 | 7.94E-05  |
| 15108709 | LOC100062552 | UPF0556 protein C19orf10 homolog                               | 1.09 | 5.70E-06  |
| 15027576 | LOC100054623 | transcription factor 19-like                                   | 1.09 | 9.20E-05  |
| 15105167 | GRAMD1B      | GRAM domain containing 1B                                      | 1.09 | 0.0011711 |
| 15131337 | SRPX         | sushi-repeat containing protein, X-linked                      | 1.09 | 0.0004097 |
| 15065525 | PLCG2        | phospholipase C, gamma 2 (phosphatidylinositol-specific)       | 1.09 | 0.0067364 |
| 15028880 | POLH         | polymerase (DNA directed), eta                                 | 1.09 | 0.0083654 |
| 15105720 | LOC100064275 | histone chaperone ASF1B-like                                   | 1.09 | 0.0010716 |
| 14940730 | LOC100065715 | leucine-rich repeat protein 1-like                             | 1.08 | 0.0002066 |
| 15069988 | LOC100070367 | DNA replication complex GINS protein PSF2-like                 | 1.08 | 8.64E-05  |
| 15048334 | LOC100062431 | cell division cycle-associated protein 4-like                  | 1.08 | 0.0005123 |
| 14940195 | PCK2         | phosphoenolpyruvate carboxykinase 2 (mitochondrial)            | 1.08 | 0.0046069 |
| 14937146 | GRAMD2       | GRAM domain containing 2                                       | 1.08 | 7.75E-05  |
| 14945083 | LOC100051861 | repulsive guidance molecule A-like                             | 1.08 | 0.0003566 |
| 14975522 | LOC100061635 | frizzled-9-like                                                | 1.08 | 9.30E-05  |
| 15092982 | CDC7         | cell division cycle 7 homolog (S. cerevisiae)                  | 1.08 | 0.0022494 |
| 15060627 | LOC100053507 | glycosyltransferase 8 domain-containing protein 2-like         | 1.08 | 9.21E-06  |
| 15103108 | LRIG3        | leucine-rich repeats and immunoglobulin-like domains 3         | 1.08 | 0.0006172 |
| 14934085 | LIPA         | lipase A, lysosomal acid, cholesterol esterase                 | 1.07 | 0.0008548 |
| 14974218 | DHCR7        | 7-dehydrocholesterol reductase                                 | 1.07 | 9.11E-06  |
| 14983935 | LOC100073256 | dihydrofolate reductase-like                                   | 1.07 | 9.01E-05  |
| 15130450 | LOC100057948 | translocon-associated protein subunit delta-like               | 1.06 | 0.0250094 |
| 15048486 | CA9          | carbonic anhydrase IX                                          | 1.06 | 0.0469728 |
| 15011841 | LOC100058694 | UDP-GlcNAc:betaGal beta-1,3-N-acetylglucosaminyltransferase    | 1.06 | 0.0016012 |
| 15127931 | LOC100051736 | putative RNA-binding protein 3-like                            | 1.06 | 0.00242   |
| 15027508 | TUBB2A       | tubulin, beta 2A class IIa                                     | 1.06 | 0.0002361 |
| 15001745 | TOPBP1       | topoisomerase (DNA) II binding protein 1                       | 1.06 | 0.0010631 |
| 15102747 | TIMELESS     | timeless homolog (Drosophila)                                  | 1.06 | 0.0007305 |
| 15110915 | CNN1         | calponin 1, basic, smooth muscle                               | 1.05 | 0.0315435 |
| 15029596 | SLC22A23     | solute carrier family 22, member 23                            | 1.05 | 0.00242   |
| 15130699 | NLGN4X       | neuroligin 4, X-linked                                         | 1.05 | 0.0330721 |
| 15031406 | LOC100064550 | transmembrane and coiled-coil domain-containing protein Cc     | 1.05 | 3.44E-05  |
| 15043238 | LOC100050442 | tight junction protein ZO-2-like                               | 1.04 | 1.27E-06  |

|          |                   |                                                                     |       |           |
|----------|-------------------|---------------------------------------------------------------------|-------|-----------|
| 14937253 | ITGA11            | integrin, alpha 11                                                  | 1.04  | 0.0273141 |
| 15060707 | CKAP4             | cytoskeleton-associated protein 4                                   | 1.04  | 7.50E-05  |
| 15086701 | S100A10           | S100 calcium binding protein A10                                    | 1.04  | 0.0044306 |
| 14983055 | SHROOM1           | shroom family member 1                                              | 1.04  | 1.68E-06  |
| 15007939 | SLC39A10          | solute carrier family 39 (zinc transporter), member 10              | 1.04  | 0.0144943 |
| 15029199 | LRRC1             | leucine rich repeat containing 1                                    | 1.03  | 9.89E-05  |
| 14986180 | CHSY3             | chondroitin sulfate synthase 3                                      | 1.03  | 0.0001115 |
| 15033420 | HMGCS1            | 3-hydroxy-3-methylglutaryl-CoA synthase 1 (soluble)                 | 1.03  | 0.0003571 |
| 15030143 | LOC100054332      | histone H4-like                                                     | 1.03  | 0.0045585 |
| 15033079 | ADAMTS6           | ADAM metalloproteinase with thrombospondin type 1 motif, 6          | 1.03  | 0.0009202 |
| 14945188 | PCSK6             | proprotein convertase subtilisin/kexin type 6                       | 1.03  | 2.61E-06  |
| 15107891 | EFHD1             | EF-hand domain family, member D1                                    | 1.02  | 0.0100358 |
| 15052711 | LOC100070413      | adenylate kinase isoenzyme 1-like                                   | 1.02  | 0.0017477 |
| 14933619 | LOC100070673      | secreted frizzled-related protein 5-like                            | 1.02  | 0.007568  |
| 15123814 | LOC100055639      | ribonuclease UK114-like                                             | 1.02  | 0.0364814 |
| 15129703 | LOC100059103      | ADP/ATP translocase 2-like                                          | 1.02  | 6.19E-05  |
| 15026945 | RNF144B           | ring finger protein 144B                                            | 1.02  | 0.0049217 |
| 15030704 | LOC100058853      | chloride intracellular channel protein 1-like                       | 1.02  | 0.0007865 |
| 14995167 | RAD18             | RAD18 homolog ( <i>S. cerevisiae</i> )                              | 1.02  | 0.0004697 |
| 14953112 | LOC100629154      | centromere protein W-like                                           | 1.02  | 0.0124708 |
| 15087870 | LOC100049922      | collagen alpha-1(XI) chain-like                                     | 1.01  | 8.25E-05  |
| 15060643 | SLC41A2           | solute carrier family 41, member 2                                  | 1.01  | 0.0012061 |
| 15040296 | LOC100070046      | protein-glutamine gamma-glutamyltransferase 2-like                  | 1.01  | 0.0042106 |
| 15052391 | LOC100071711      | erythrocyte band 7 integral membrane protein-like                   | 1.01  | 0.0014268 |
| 15064272 | CPNE2             | copine II                                                           | 1.00  | 4.23E-05  |
| 14986226 | SLC12A2           | solute carrier family 12 (sodium/potassium/chloride transporter)    | 1.00  | 0.0001514 |
| 15012429 | MF12              | antigen p97 (melanoma associated) identified by monoclonal antibody | 1.00  | 0.0010528 |
| 15085582 | LOC100630691      | Purkinje cell protein 4-like protein 1-like                         | 1.00  | 0.0006887 |
| 14961882 | LOC100630810      | protein EVI2A-like                                                  | 1.00  | 0.010767  |
| 15135480 | ---               | ---                                                                 | 1.00  | 0.0045901 |
| 15109357 | MMP1              | matrix metalloproteinase 1 (interstitial collagenase)               | -8.46 | 6.21E-21  |
| 15071093 | CXCL6             | chemokine (C-X-C motif) ligand 6                                    | -6.90 | 3.39E-17  |
| 15109367 | MMP3              | matrix metalloproteinase 3 (stromelysin 1, progelatinase)           | -6.51 | 9.19E-15  |
| 15094462 | LOC100629808      | c-C motif chemokine 20-like                                         | -5.52 | 4.38E-17  |
| 15109386 | MMP13             | matrix metalloproteinase 13 (collagenase 3)                         | -5.24 | 6.30E-13  |
| 15108043 | SAA // LOC1000567 | serum amyloid A1 // serum amyloid A protein-like // serum amyloid A | -5.20 | 3.83E-13  |
| 14991538 | IL-1RII           | interleukin-1 receptor type II                                      | -4.95 | 1.86E-13  |
| 15071082 | ECA.13530         | ---                                                                 | -4.86 | 7.35E-10  |
| 15112997 | SAA1              | serum amyloid A1                                                    | -4.63 | 1.07E-16  |
| 14946865 | NMES1             | normal mucosa of esophagus-specific gene 1 protein                  | -4.54 | 1.71E-12  |
| 15113003 | SAA               | serum amyloid A1                                                    | -4.39 | 2.59E-18  |
| 15108047 | SAA1              | serum amyloid A1                                                    | -4.34 | 2.59E-18  |
| 15077930 | IL6               | interleukin 6 (interferon, beta 2)                                  | -4.08 | 1.77E-06  |
| 15071075 | CXCL1             | chemokine (C-X-C motif) ligand 1 (melanoma growth stimulatory       | -4.05 | 1.30E-08  |
| 14967223 | INOS              | inducible nitric oxide synthase                                     | -4.03 | 7.99E-09  |
| 15112999 | SAA1              | serum amyloid A1                                                    | -3.99 | 4.46E-16  |
| 15038136 | LOC100056125      | elafin-like                                                         | -3.91 | 5.57E-07  |
| 15011434 | PTX3              | pentraxin 3, long                                                   | -3.65 | 2.78E-10  |
| 15027736 | CFB               | complement factor B                                                 | -3.64 | 4.19E-06  |
| 15134370 | ---               | ---                                                                 | -3.60 | 2.39E-16  |
| 15018127 | SPLA2             | secretory phospholipase A2                                          | -3.46 | 6.33E-06  |
| 15109344 | MMP8              | matrix metalloproteinase 8 (neutrophil collagenase)                 | -3.45 | 0.0312683 |
| 15109378 | LOC100069047      | macrophage metalloelastase-like                                     | -3.44 | 4.83E-06  |
| 14966729 | LOC100071384      | carbonic anhydrase 4-like                                           | -3.37 | 1.25E-05  |
| 15081313 | STEAP4            | STEAP family member 4                                               | -3.37 | 0.000368  |
| 15104093 | BIRC3             | baculoviral IAP repeat containing 3                                 | -3.30 | 4.35E-07  |
| 15098538 | IGFBP-5           | insulin-like growth factor binding protein-5                        | -3.27 | 1.27E-06  |
| 14943027 | ANK3              | ankyrin 3, node of Ranvier (ankyrin G)                              | -3.08 | 3.25E-06  |
| 14986309 | ---               | ---                                                                 | -3.00 | 4.06E-11  |
| 15071098 | IL8               | interleukin 8                                                       | -2.99 | 0.0004022 |
| 15090278 | LOC100056429      | corticosteroid 11-beta-dehydrogenase isozyme 1-like                 | -2.80 | 0.0005071 |
| 15128105 | LOC100146482      | ferritin heavy chain-like                                           | -2.78 | 1.49E-09  |
| 15031542 | LOC100054285      | triggering receptor expressed on myeloid cells 1-like               | -2.65 | 8.62E-06  |
| 15054932 | ADAMTS5           | ADAM metalloproteinase with thrombospondin type 1 motif, 5          | -2.61 | 4.32E-10  |



|          |              |                                                                |       |           |
|----------|--------------|----------------------------------------------------------------|-------|-----------|
| 15124168 | ANGPT1       | angiopoietin 1                                                 | -2.57 | 1.28E-05  |
| 15057122 | NRG1         | neuregulin 1                                                   | -2.55 | 5.86E-06  |
| 15088003 | DPYD         | dihydropyrimidine dehydrogenase                                | -2.54 | 6.02E-11  |
| 15076503 | ---          | ---                                                            | -2.44 | 0.0013377 |
| 14991995 | IL1A         | interleukin 1, alpha                                           | -2.44 | 0.0029584 |
| 15075712 | SOD2         | superoxide dismutase 2, mitochondrial                          | -2.35 | 3.11E-13  |
| 15064176 | LOC100630858 | metallothionein-2-like                                         | -2.34 | 0.0175002 |
| 15108234 | LOC100057503 | growth arrest-specific protein 2-like                          | -2.33 | 2.94E-09  |
| 15095888 | A2ML1        | alpha-2-macroglobulin-like 1                                   | -2.27 | 8.51E-06  |
| 15076505 | ---          | ---                                                            | -2.18 | 3.39E-07  |
| 14973160 | FTH1         | ferritin, heavy polypeptide 1                                  | -2.13 | 1.44E-11  |
| 14934217 | UBE2D1       | ubiquitin-conjugating enzyme E2D 1                             | -2.11 | 3.42E-11  |
| 14969771 | ---          | ---                                                            | -2.11 | 1.44E-11  |
| 14941712 | ADRA2A       | adrenoceptor alpha 2A                                          | -2.10 | 4.68E-08  |
| 15042675 | FTH1         | ferritin, heavy polypeptide 1                                  | -2.10 | 1.04E-13  |
| 14946755 | FGF7         | fibroblast growth factor 7                                     | -2.09 | 0.0011028 |
| 15107741 | AMPD3        | adenosine monophosphate deaminase 3                            | -2.08 | 8.74E-07  |
| 15020907 | LOC100072294 | TNFAIP3-interacting protein 3-like                             | -2.07 | 7.52E-07  |
| 14934469 | LOC100063248 | serglycin-like                                                 | -2.05 | 0.0002062 |
| 14990082 | LOC100070088 | cytochrome P450 1B1-like                                       | -2.03 | 2.30E-09  |
| 15056255 | LOC100050240 | low affinity cationic amino acid transporter 2-like            | -2.01 | 9.70E-12  |
| 15064092 | MMP2         | matrix metalloproteinase 2 (gelatinase A, 72kDa gelatinase, 72 | -2.00 | 1.41E-11  |
| 15098024 | SLC16A7      | solute carrier family 16, member 7 (monocarboxylic acid trans  | -2.00 | 0.0019305 |
| 14948692 | ---          | ---                                                            | -2.00 | 9.47E-10  |
| 15022310 | MFS2A        | major facilitator superfamily domain containing 2A             | -1.98 | 1.70E-08  |
| 15090286 | LOC100056475 | g0/G1 switch regulatory protein 2-like                         | -1.97 | 5.02E-05  |
| 14953386 | TNFAIP3      | tumor necrosis factor, alpha-induced protein 3                 | -1.97 | 3.91E-07  |
| 15100843 | ABCC9        | ATP-binding cassette, sub-family C (CFTR/MRP), member 9        | -1.95 | 0.0009128 |
| 15092613 | VCAM         | vascular cell adhesion molecule                                | -1.94 | 0.0017497 |
| 15113767 | LOC100629131 | leukemia inhibitory factor-like                                | -1.93 | 0.0022346 |
| 14993281 | EPAS1        | endothelial PAS domain protein 1                               | -1.92 | 7.85E-06  |
| 15077811 | ITGB8        | integrin, beta 8                                               | -1.92 | 0.0005134 |
| 15086640 | LOC100056061 | protein S100-A12-like                                          | -1.87 | 0.0180899 |
| 15009044 | ZEB2         | zinc finger E-box binding homeobox 2                           | -1.80 | 2.21E-08  |
| 15022470 | LOC100069173 | ribonuclease ZC3H12A-like                                      | -1.79 | 5.03E-07  |
| 15091633 | ECM1         | extracellular matrix protein 1                                 | -1.79 | 8.86E-05  |
| 15112034 | LOC100052723 | folate receptor beta-like                                      | -1.74 | 1.09E-08  |
| 14932983 | GPAM         | glycerol-3-phosphate acyltransferase, mitochondrial            | -1.70 | 3.59E-08  |
| 15072191 | ---          | ---                                                            | -1.69 | 0.0008052 |
| 14963412 | MYOCD        | myocardin                                                      | -1.67 | 0.0003001 |
| 15031833 | ENPP5        | ectonucleotide pyrophosphatase/phosphodiesterase 5 (putat      | -1.65 | 0.0003194 |
| 14974139 | CPT1A        | carnitine palmitoyltransferase 1A (liver)                      | -1.63 | 0.0001501 |
| 14952871 | LOC100072561 | ---                                                            | -1.58 | 6.23E-05  |
| 15020229 | LOC100061944 | protein FAM198B-like                                           | -1.57 | 0.0007887 |
| 15089829 | GLUL         | glutamate-ammonia ligase                                       | -1.57 | 1.28E-05  |
| 15123017 | ATP6V0D2     | ATPase, H+ transporting, lysosomal 38kDa, V0 subunit d2        | -1.57 | 0.0016741 |
| 15076507 | ---          | ---                                                            | -1.57 | 1.03E-05  |
| 15052916 | PTGES        | prostaglandin E synthase                                       | -1.55 | 0.0001283 |
| 15063355 | CACNB2       | calcium channel, voltage-dependent, beta 2 subunit             | -1.54 | 0.0247897 |
| 14970624 | ---          | ---                                                            | -1.53 | 0.0234346 |
| 15054158 | BACE2        | beta-site APP-cleaving enzyme 2                                | -1.52 | 2.97E-10  |
| 15014757 | PARP14       | poly (ADP-ribose) polymerase family, member 14                 | -1.50 | 2.42E-06  |
| 14973467 | LOC100049811 | uncharacterized LOC100049811                                   | -1.49 | 6.23E-05  |
| 15001342 | LOC100056080 | f-box/LRR-repeat protein 2-like                                | -1.48 | 7.42E-06  |
| 15089848 | LOC100051514 | regulator of G-protein signaling 16-like                       | -1.47 | 0.0001763 |
| 15049336 | PAPP-A       | pregnancy-associated plasma protein-A                          | -1.47 | 0.0444066 |
| 15072160 | SLIT2        | slit homolog 2 (Drosophila)                                    | -1.47 | 0.0074939 |
| 15093253 | PTGFR        | prostaglandin F receptor (FP)                                  | -1.46 | 5.61E-05  |
| 15028286 | LOC100064022 | cyclin-dependent kinase inhibitor 1-like                       | -1.46 | 0.0020275 |
| 15114454 | TBX3         | T-box 3                                                        | -1.43 | 1.35E-06  |
| 15073262 | LOC100070601 | sushi domain-containing protein 4-like                         | -1.39 | 0.0006764 |
| 15024271 | PIK3CD       | phosphatidylinositol-4,5-bisphosphate 3-kinase, catalytic sub  | -1.39 | 9.07E-06  |
| 15076510 | LOC100056814 | membrane-associated guanylate kinase, WW and PDZ domain        | -1.39 | 5.61E-05  |
| 14957120 | FYN          | FYN oncogene related to SRC, FGR, YES                          | -1.39 | 1.70E-08  |

|          |              |                                                                   |       |           |
|----------|--------------|-------------------------------------------------------------------|-------|-----------|
| 14988502 | LOC100065031 | interleukin-1 family member 9-like                                | -1.38 | 0.0005957 |
| 15129012 | ---          | ---                                                               | -1.37 | 9.69E-05  |
| 15012728 | MYLK         | myosin light chain kinase                                         | -1.36 | 2.40E-06  |
| 15033181 | LOC100051484 | serine/threonine-protein kinase PLK2-like                         | -1.35 | 0.0285039 |
| 14990733 | LOC100071618 | quinone oxidoreductase PIG3-like                                  | -1.34 | 0.0067628 |
| 15085297 | LOC100054805 | zinc transporter 1-like                                           | -1.34 | 0.0001041 |
| 14967688 | LOC100072377 | large neutral amino acids transporter small subunit 4-like        | -1.33 | 0.0028072 |
| 15018013 | LOC100071727 | endothelin-converting enzyme 1-like                               | -1.33 | 7.07E-05  |
| 15101954 | SLC11A2      | solute carrier family 11 (proton-coupled divalent metal ion tra   | -1.32 | 0.0002471 |
| 15052048 | LOC100056842 | thymic stromal cotransporter homolog                              | -1.32 | 0.0005535 |
| 15076539 | PION         | pigeon homolog (Drosophila)                                       | -1.32 | 0.0001092 |
| 14984309 | SQSTM1       | sequestosome 1                                                    | -1.32 | 5.13E-05  |
| 15046200 | DIO3         | deiodinase, iodothyronine, type III                               | -1.31 | 0.0118871 |
| 15077164 | EGFR         | epidermal growth factor receptor                                  | -1.30 | 0.0007948 |
| 14933530 | LOC100070443 | mitoferrin-2-like                                                 | -1.30 | 2.97E-09  |
| 15022885 | PTPRU        | protein tyrosine phosphatase, receptor type, U                    | -1.29 | 1.56E-06  |
| 15081700 | ETV1         | ets variant 1                                                     | -1.29 | 0.0001848 |
| 15012507 | TFRC         | transferrin receptor (p90, CD71)                                  | -1.28 | 7.85E-05  |
| 14981772 | SLIT3        | slit homolog 3 (Drosophila)                                       | -1.28 | 0.0109633 |
| 15100663 | LOC100063835 | histone H4-like                                                   | -1.28 | 0.0315692 |
| 15035668 | CARD6        | caspase recruitment domain family, member 6                       | -1.27 | 4.29E-05  |
| 15020622 | TBC1D9       | TBC1 domain family, member 9 (with GRAM domain)                   | -1.27 | 0.0277236 |
| 15040901 | ---          | ---                                                               | -1.27 | 0.0312683 |
| 14995550 | LOC100056410 | calcium-dependent secretion activator 1-like                      | -1.27 | 0.0068312 |
| 14969086 | LOC100073170 | multidrug and toxin extrusion protein 1-like                      | -1.27 | 0.0009765 |
| 15100625 | PLBD1        | phospholipase B domain containing 1                               | -1.27 | 0.0068454 |
| 15129754 | GRIA3        | glutamate receptor, ionotropic, AMPA 3                            | -1.26 | 0.0427957 |
| 14980417 | LOC100629909 | vasorin-like                                                      | -1.26 | 4.15E-07  |
| 15035665 | CARD6        | ---                                                               | -1.25 | 0.0001298 |
| 15001743 | ---          | ---                                                               | -1.25 | 4.79E-09  |
| 14962705 | LOC100061442 | c-X-C motif chemokine 16-like                                     | -1.24 | 0.0074939 |
| 15129681 | LONRF3       | LON peptidase N-terminal domain and ring finger 3                 | -1.23 | 7.36E-05  |
| 15117714 | MTMR3        | myotubularin related protein 3                                    | -1.22 | 6.98E-07  |
| 14948020 | ---          | ---                                                               | -1.22 | 0.0408621 |
| 15042730 | DAPK1        | death-associated protein kinase 1                                 | -1.22 | 0.0010413 |
| 15116277 | LOC100067480 | molybdenum cofactor sulfurase-like                                | -1.21 | 0.0001835 |
| 15066585 | LOC100051954 | transmembrane protein 150C-like                                   | -1.21 | 0.0114789 |
| 15019483 | LOC100057232 | zinc transporter ZIP14-like                                       | -1.21 | 4.09E-06  |
| 14953356 | PDE7B        | phosphodiesterase 7B                                              | -1.19 | 0.006515  |
| 15137402 | ---          | ---                                                               | -1.19 | 0.0280427 |
| 14998968 | LOC100051258 | peroxisome proliferator-activated receptor gamma-like             | -1.18 | 0.000235  |
| 15092727 | LOC100050774 | palmdelphin-like                                                  | -1.18 | 0.005436  |
| 14966992 | CCL2         | chemokine (C-C motif) ligand 2                                    | -1.18 | 0.0001643 |
| 15083882 | MDM4         | Mdm4 p53 binding protein homolog (mouse)                          | -1.18 | 0.0008585 |
| 15061876 | ---          | ---                                                               | -1.17 | 0.0351126 |
| 15054911 | ---          | ---                                                               | -1.16 | 0.0061391 |
| 15054120 | KCNJ15       | potassium inwardly-rectifying channel, subfamily J, member 1      | -1.16 | 0.0002883 |
| 15035773 | SLC1A3       | solute carrier family 1 (glial high affinity glutamate transporte | -1.16 | 2.73E-06  |
| 14990261 | ---          | ---                                                               | -1.16 | 9.62E-05  |
| 15042486 | NFIL3        | nuclear factor, interleukin 3 regulated                           | -1.15 | 9.44E-07  |
| 15075002 | ---          | ---                                                               | -1.14 | 1.10E-07  |
| 15003404 | ENOX1        | ecto-NOX disulfide-thiol exchanger 1                              | -1.14 | 1.99E-05  |
| 15122523 | MIR1204      | microRNA mir-1204                                                 | -1.13 | 0.0448235 |
| 15043406 | ERMP1        | endoplasmic reticulum metalloproteinase 1                         | -1.13 | 0.0056132 |
| 15120723 | ZADH2        | zinc binding alcohol dehydrogenase domain containing 2            | -1.13 | 5.50E-06  |
| 15080682 | INHBA        | inhibin, beta A                                                   | -1.12 | 0.0067897 |
| 15038464 | ---          | ---                                                               | -1.12 | 3.15E-05  |
| 15045643 | SLC24A4      | solute carrier family 24 (sodium/potassium/calcium exchange       | -1.12 | 0.0262541 |
| 15011051 | AOX1 // AOX1 | aldehyde oxidase 1 // aldehyde oxidase 1                          | -1.12 | 0.006726  |
| 14957413 | ---          | ---                                                               | -1.12 | 0.0118262 |
| 15019764 | PTK2B        | PTK2B protein tyrosine kinase 2 beta                              | -1.12 | 0.0009577 |
| 15123873 | LOC100055346 | tumor protein p53-inducible nuclear protein 1-like                | -1.11 | 0.0028258 |
| 15104618 | SIDT2        | SID1 transmembrane family, member 2                               | -1.10 | 2.38E-06  |
| 15060753 | BPIL2        | BPI fold containing family C                                      | -1.10 | 0.0481257 |

|          |              |                                                              |       |           |
|----------|--------------|--------------------------------------------------------------|-------|-----------|
| 15041841 | SMARCA2      | SWI/SNF related, matrix associated, actin dependent regulato | -1.09 | 1.92E-11  |
| 15109433 | LOC100069303 | caspase-4-like                                               | -1.09 | 1.44E-06  |
| 15065841 | FTH1         | ferritin, heavy polypeptide 1                                | -1.09 | 1.61E-05  |
| 14942004 | TRIM8        | tripartite motif containing 8                                | -1.09 | 7.57E-06  |
| 15043894 | LOC100068209 | beta-1,4-galactosyltransferase 1-like                        | -1.09 | 0.006282  |
| 15009087 | LOC100050088 | rho-related GTP-binding protein RhoE-like                    | -1.09 | 0.0037601 |
| 15124426 | SNTB1        | syntrophin, beta 1 (dystrophin-associated protein A1, 59kDa, | -1.08 | 0.0143442 |
| 15136462 | ---          | ---                                                          | -1.08 | 0.0235276 |
| 15136488 | ---          | ---                                                          | -1.08 | 0.0235276 |
| 15136592 | ---          | ---                                                          | -1.08 | 0.0235276 |
| 15137066 | ---          | ---                                                          | -1.08 | 0.0235276 |
| 15137168 | ---          | ---                                                          | -1.08 | 0.0235276 |
| 15137708 | ---          | ---                                                          | -1.08 | 0.0235276 |
| 15137716 | ---          | ---                                                          | -1.08 | 0.0235276 |
| 14983399 | LOC100064222 | protein fem-1 homolog C-like                                 | -1.08 | 0.0013204 |
| 15062032 | MAP3K8       | mitogen-activated protein kinase kinase kinase 8             | -1.08 | 0.0044212 |
| 15004629 | SLC46A3      | solute carrier family 46, member 3                           | -1.08 | 0.022964  |
| 15077776 | AHR          | aryl hydrocarbon receptor                                    | -1.07 | 0.0086917 |
| 15093117 | CLCA2        | chloride channel accessory 2                                 | -1.07 | 0.0089197 |
| 15137472 | ---          | ---                                                          | -1.07 | 0.0272497 |
| 15024111 | LOC100051052 | type-1 angiotensin II receptor-associated protein-like       | -1.07 | 0.0001128 |
| 14994399 | ---          | ---                                                          | -1.06 | 0.0034422 |
| 15125994 | LOC100061108 | aldehyde dehydrogenase family 1 member L1-like               | -1.05 | 0.0324768 |
| 15103945 | ANGPTL4      | angiopoietin-like 4                                          | -1.05 | 0.0095428 |
| 14945672 | ---          | ---                                                          | -1.05 | 0.0490535 |
| 15072189 | MIR218       | microRNA mir-218                                             | -1.05 | 0.0388243 |
| 15004775 | ---          | ---                                                          | -1.05 | 0.0011675 |
| 15025199 | CLCN3        | chloride channel, voltage-sensitive 3                        | -1.04 | 0.0006828 |
| 15080189 | ---          | ---                                                          | -1.04 | 0.0114512 |
| 15085328 | LOC100056564 | laminin subunit beta-3-like                                  | -1.03 | 0.0188945 |
| 15063666 | PFKFB3       | 6-phosphofructo-2-kinase/fructose-2,6-biphosphatase 3        | -1.03 | 0.0071034 |
| 14988744 | CAPG         | capping protein (actin filament), gelsolin-like              | -1.03 | 0.0010285 |
| 15122512 | TRIB1        | tribbles homolog 1 (Drosophila)                              | -1.03 | 0.003092  |
| 14949346 | LOC100050415 | sodium channel subunit beta-1-like                           | -1.02 | 0.0072994 |
| 15064171 | LOC100630645 | metallothionein-2-like                                       | -1.02 | 0.0069866 |
| 15096340 | RASSF8       | Ras association (RalGDS/AF-6) domain family (N-terminal) mer | -1.02 | 3.11E-06  |
| 15044115 | LOC100061893 | sphingosine 1-phosphate receptor 3-like                      | -1.02 | 0.016364  |
| 15084893 | LOC100051658 | n-acetylneuraminate lyase-like                               | -1.02 | 0.0146903 |
| 14992709 | ANTXR1       | anthrax toxin receptor 1                                     | -1.02 | 0.0001558 |
| 15124047 | RRM2B        | ribonucleotide reductase M2 B (TP53 inducible)               | -1.01 | 0.0089131 |
| 15026631 | ---          | ---                                                          | -1.01 | 0.0319864 |
| 15038461 | ---          | ---                                                          | -1.00 | 0.0005275 |
| 14999300 | ITPR1        | inositol 1,4,5-trisphosphate receptor, type 1                | -1.00 | 1.19E-05  |
