# Supplementary material for: Conditioned serum in vitro treatment of chondrocyte pellets and osteoarthritic explants
Source: PubMed Central journal article supplement — Equine Vet J. 2022 Jun 6;55(2):325–35. doi: 10.1111/evj.13582 (PMC10084271; doi:10.1111/evj.13582), 2022-06-06
Supplement: EVJ-55-325-s003.pdf [file EVJ-55-325-s003.pdf]

**Table S5:** Gene expression in pellets treated with pooled serum (PS), pooled serum incubated for 24 h (PS24h), and pooled conditioned serum (PCS) compared with that in untreated controls (interleukin (IL)-1 $\beta$ -stimulated pellets) after 48 h. Genes were grouped based on significantly upregulated expression in the treatment groups.

| Gene symbol                             | Gene name                                                                                     | Probe set ID | PS Log2 FC | PS24h Log2 FC | PCS Log2 FC |
|-----------------------------------------|-----------------------------------------------------------------------------------------------|--------------|------------|---------------|-------------|
| <b>Upregulated in PS, PS24h and PCS</b> |                                                                                               |              |            |               |             |
| ADAMTS5                                 | ADAM metalloproteinase with thrombospondin type 1 motif, 5                                    | 15054932     | 2.86       | 3.36          | 2.99        |
| FGF7                                    | fibroblast growth factor 7                                                                    | 14946755     | 2.60       | 3.26          | 2.96        |
| IL6                                     | interleukin 6 (interferon, beta 2)                                                            | 15077930     | 2.39       | 2.45          | 2.63        |
| IL11                                    | interleukin 11                                                                                | 14955834     | 2.12       | 3.45          | 2.97        |
| LOC100050582                            | SH3 and cysteine-rich domain-containing protein-like                                          | 15001287     | 1.76       | 2.22          | 2.35        |
| LOC100063248                            | serglycin-like                                                                                | 14934469     | 1.74       | 2.39          | 2.47        |
| VCAM                                    | vascular cell adhesion molecule                                                               | 15092613     | 1.73       | 1.80          | 2.12        |
| ABCC9                                   | ATP-binding cassette, sub-family C (CFTR/MRP), member 9                                       | 15100843     | 1.72       | 1.74          | 1.88        |
| FGL2                                    | fibrinogen-like 2                                                                             | 15076569     | 1.70       | 1.75          | 2.34        |
| SERPINE2                                | serpin peptidase inhibitor, clade E (nexin, plasminogen activator inhibitor type 1), member 2 | 15098920     | 1.60       | 1.74          | 1.76        |
| ADAMTS1                                 | ADAM metalloproteinase with thrombospondin type 1 motif, 1                                    | 15054923     | 1.58       | 2.08          | 1.77        |
| LOC100053052                            | protein KIAA1199-like                                                                         | 14944603     | 1.55       | 1.48          | 1.47        |
| LOC100067818                            | angiopoietin-4-like                                                                           | 15037079     | 1.53       | 1.43          | 1.39        |
| PDE7B                                   | phosphodiesterase 7B                                                                          | 14953356     | 1.52       | 1.96          | 1.90        |
| EPAS1                                   | endothelial PAS domain protein 1                                                              | 14993281     | 1.51       | 1.53          | 1.63        |
| IL-1RII                                 | interleukin-1 receptor type II                                                                | 14991538     | 1.49       | 2.02          | 1.91        |
| ATP6V0D2                                | ATPase, H <sup>+</sup> transporting, lysosomal 38kDa, V0 subunit d2                           | 15123017     | 1.48       | 1.53          | 1.58        |
| MYOCD                                   | myocardin                                                                                     | 14963412     | 1.46       | 1.63          | 1.35        |
| RGS2                                    | regulator of G-protein signaling 2, 24kDa                                                     | 15073546     | 1.45       | 2.38          | 2.16        |
| LOC100071592                            | uncharacterised LOC100071592                                                                  | 15017810     | 1.42       | 1.42          | 1.33        |
| MACC1                                   | metastasis associated in colon cancer 1                                                       | 15081833     | 1.27       | 1.41          | 1.13        |
| SULF1                                   | sulfatase 1                                                                                   | 15123257     | 1.25       | 1.69          | 1.53        |
| ITGB3                                   | integrin, beta 3 (platelet glycoprotein IIIa, antigen CD61)                                   | 14965242     | 1.17       | 1.74          | 1.40        |

|                             |                                                                              |          |      |      |       |
|-----------------------------|------------------------------------------------------------------------------|----------|------|------|-------|
| PLEKHH2                     | pleckstrin homology domain containing, family H (with MyTH4 domain) member 2 | 14993363 | 1.06 | 1.53 | 1.34  |
| SMOC1                       | SPARC related modular calcium binding 1                                      | 15045019 | 1.04 | 1.42 | 1.32  |
| LOC100056470                | uncharacterised LOC100056470                                                 | 15062489 | 1.03 | 1.41 | 1.23  |
| ANTXR1                      | anthrax toxin receptor 1                                                     | 14992709 | 1.02 | 1.22 | 1.09  |
| <b>Upregulated in PS</b>    |                                                                              |          |      |      |       |
| LOC100067869                | haptoglobin-like                                                             | 15069510 | 2.20 | 1.81 | 2.11  |
| ---                         | ---                                                                          | 15036667 | 1.29 | 0.05 | -0.40 |
| PDGFD                       | platelet derived growth factor D                                             | 15109412 | 1.17 | 0.66 | 0.79  |
| GDF10                       | growth differentiation factor 10                                             | 14935616 | 1.12 | 1.00 | 0.99  |
| RFTN1                       | raftlin, lipid raft linker 1                                                 | 14997779 | 1.10 | 0.47 | 0.88  |
| ---                         | ---                                                                          | 15072071 | 1.06 | 0.80 | 0.80  |
| LOC100064143                | protein yippee-like 3-like                                                   | 14979399 | 1.03 | 0.96 | 0.97  |
| ---                         | ---                                                                          | 15080146 | 1.01 | 0.33 | 0.42  |
| LOC100067330                | tropomyosin alpha-1 chain-like                                               | 14946416 | 1.00 | 0.74 | 0.88  |
| <b>Upregulated in PS24h</b> |                                                                              |          |      |      |       |
| ---                         | ---                                                                          | 14950854 | 0.09 | 1.80 | 1.30  |
| NRG1                        | neuregulin 1                                                                 | 15057122 | 0.93 | 1.75 | 1.34  |
| ITGB8                       | integrin, beta 8                                                             | 15077811 | 1.37 | 1.65 | 1.38  |
| LOC100060254                | tumour necrosis factor ligand superfamily member 11-like                     | 15005202 | 0.68 | 1.49 | 1.18  |
| BMP2                        | bone morphogenetic protein 2                                                 | 15039441 | 0.57 | 1.46 | 1.02  |
| KCNJ15                      | potassium inwardly-rectifying channel, subfamily J, member 15                | 15054120 | 0.63 | 1.40 | 0.85  |
| ERMP1                       | endoplasmic reticulum metalloproteinase 1                                    | 15043406 | 0.18 | 1.40 | 1.01  |
| ---                         | ---                                                                          | 15044655 | 0.78 | 1.38 | 1.12  |
| AHR                         | aryl hydrocarbon receptor                                                    | 15077776 | 0.70 | 1.27 | 0.90  |
| DAAM2                       | dishevelled associated activator of morphogenesis 2                          | 15028498 | 0.87 | 1.25 | 0.91  |
| ALCAM                       | activated leukocyte cell adhesion molecule                                   | 15015272 | 0.11 | 1.24 | 0.60  |
| LOC100052445                | retinol dehydrogenase 16-like                                                | 15102879 | 0.50 | 1.23 | 0.52  |
| ABCC1                       | ATP-binding cassette, sub-family C (CFTR/MRP), member 1                      | 14980066 | 0.59 | 1.12 | 0.65  |
| FBXL13                      | F-box and leucine-rich repeat protein 13                                     | 15080211 | 0.63 | 1.09 | 0.89  |
| LYN                         | v-src-1 Yamaguchi sarcoma viral related oncogene homolog                     | 15123541 | 0.24 | 1.06 | 0.83  |
| LOC100056842                | thymic stromal cotransporter homolog                                         | 15052048 | 0.43 | 1.05 | 0.69  |

|                                     |                                                                      |          |      |      |      |
|-------------------------------------|----------------------------------------------------------------------|----------|------|------|------|
| TES                                 | testis derived transcript (3 LIM domains)                            | 15078418 | 0.72 | 1.04 | 0.88 |
| SYNE2                               | spectrin repeat containing, nuclear envelope 2                       | 15044672 | 0.72 | 1.02 | 0.94 |
| <b>Upregulated in PCS</b>           |                                                                      |          |      |      |      |
| BIRC3                               | baculoviral IAP repeat containing 3                                  | 15104093 | 1.26 | 1.06 | 1.86 |
| FCER1G                              | Fc fragment of IgE, high affinity I, receptor for; gamma polypeptide | 15085566 | 0.59 | 1.17 | 1.54 |
| ANTXR2                              | anthrax toxin receptor 2                                             | 15066646 | 0.82 | 1.00 | 1.14 |
| EDNRA                               | endothelin receptor type A                                           | 15025681 | 0.62 | 0.89 | 1.13 |
| MAP2K6                              | mitogen-activated protein kinase kinase 6                            | 14964833 | 0.64 | 1.02 | 1.12 |
| LOC100071946                        | mas-related G-protein coupled receptor member X3-like                | 15113074 | 0.87 | 1.00 | 1.10 |
| INHBA                               | inhibin, beta A                                                      | 15080682 | 0.50 | 0.96 | 1.10 |
| HEG1                                | HEG homolog 1 (zebrafish)                                            | 15012672 | 0.54 | 0.65 | 1.07 |
| SMOX                                | spermine oxidase                                                     | 15039491 | 0.55 | 0.83 | 1.03 |
| <b>Upregulated in PS and PS24h</b>  |                                                                      |          |      |      |      |
| LOC100056324                        | neuronal pentraxin-1-like                                            | 14958187 | 1.51 | 1.45 | 1.45 |
| SYTL2                               | synaptotagmin-like 2                                                 | 15106674 | 1.10 | 1.10 | 0.93 |
| <b>Upregulated in PS and PCS</b>    |                                                                      |          |      |      |      |
| LOC100629997                        | c-X-C motif chemokine 13-like                                        | 15070945 | 3.14 | 0.93 | 3.59 |
| LOC100053029                        | osteopontin-like                                                     | 15070618 | 1.60 | 1.01 | 1.65 |
| SEL1L3                              | sel-1 suppressor of lin-12-like 3 (C. elegans)                       | 15067828 | 1.47 | 1.33 | 1.71 |
| LOC100057765                        | gremlin-1-like                                                       | 14939376 | 1.23 | 0.77 | 1.27 |
| LOC100050415                        | sodium channel subunit beta-1-like                                   | 14949346 | 1.06 | 0.94 | 1.12 |
| <b>Upregulated in PS24h and PCS</b> |                                                                      |          |      |      |      |
| LOC100060890                        | vascular endothelial growth factor C-like                            | 15056500 | 0.98 | 2.05 | 1.23 |
| ---                                 | ---                                                                  | 15072191 | 1.08 | 1.38 | 1.39 |
| LOC100055845                        | secreted frizzled-related protein 1-like                             | 15055871 | 1.10 | 1.31 | 1.65 |
| PTGES                               | prostaglandin E synthase                                             | 15052916 | 0.72 | 1.31 | 1.12 |
| STK17B                              | serine/threonine kinase 17b                                          | 15010859 | 0.79 | 1.30 | 1.33 |
| LOC100072377                        | large neutral amino acids transporter small subunit 4-like           | 14967688 | 0.98 | 1.19 | 1.55 |
| TIMP3                               | TIMP metalloproteinase inhibitor 3                                   | 15058862 | 0.64 | 1.19 | 1.17 |
| LOC100055752                        | calcipressin-2-like                                                  | 15031837 | 0.88 | 1.15 | 1.14 |
| GPAM                                | glycerol-3-phosphate acyltransferase, mitochondrial                  | 14932983 | 0.72 | 1.14 | 1.00 |
| DPYD                                | dihydropyrimidine dehydrogenase                                      | 15088003 | 0.95 | 1.12 | 1.21 |

|              |                                           |          |      |      |      |
|--------------|-------------------------------------------|----------|------|------|------|
| LOC100062432 | calciressin-1-like                        | 15055245 | 0.78 | 1.11 | 1.33 |
| NOX4         | NADPH oxidase 4                           | 15106598 | 1.00 | 1.05 | 1.12 |
| LOC100050088 | rho-related GTP-binding protein RhoE-like | 15009087 | 0.70 | 1.01 | 1.14 |

---, probe set ID without known gene nam
