# Supplementary material for: Conditioned serum in vitro treatment of chondrocyte pellets and osteoarthritic explants
Source: PubMed Central journal article supplement — Equine Vet J. 2022 Jun 6;55(2):325–35. doi: 10.1111/evj.13582 (PMC10084271; doi:10.1111/evj.13582), 2022-06-06
Supplement: EVJ-55-325-s004.pdf [file EVJ-55-325-s004.pdf]

**Table S3:** Significantly differentially expressed genes between unstimulated (culture media) and untreated controls (interleukin (IL)-1 $\beta$ -stimulated pellets) after 48 h.

| Probe Set ID | Gene Symbol  | Gene Description                                               | Log2 FC (unstimulated controls compared to untreated controls (IL-1 $\beta$ stimulated)) | Adjusted p-value |
|--------------|--------------|----------------------------------------------------------------|------------------------------------------------------------------------------------------|------------------|
| 15024154     | ANGPTL7      | angiopoietin-like 7                                            | 4.70                                                                                     | 4.58E-13         |
| 15029648     | F13A1        | coagulation factor XIII, A1 polypeptide                        | 4.18                                                                                     | 2.41E-11         |
| 15004827     | POSTN        | periostin, osteoblast specific factor                          | 3.32                                                                                     | 4.81E-06         |
| 15101410     | NELL2        | NEL-like 2 (chicken)                                           | 3.21                                                                                     | 1.84E-10         |
| 15076168     | LOC100063831 | NKG2D ligand 1-like                                            | 2.87                                                                                     | 0.000176         |
| 15077718     | LOC100052612 | adseverin-like                                                 | 2.85                                                                                     | 1.48E-07         |
| 15014926     | LOC100070985 | phospholipase A1 member A-like                                 | 2.84                                                                                     | 5.29E-09         |
| 14998606     | MME          | membrane metallo-endopeptidase                                 | 2.79                                                                                     | 5.33E-08         |
| 15081535     | PDK4         | pyruvate dehydrogenase kinase, isozyme 4                       | 2.63                                                                                     | 2.50E-05         |
| 15087664     | SLC16A4      | solute carrier family 16, member 4 (monocarboxylic acid tran   | 2.58                                                                                     | 1.65E-07         |
| 15101596     | COL2A1       | collagen, type II, alpha 1                                     | 2.53                                                                                     | 6.98E-05         |
| 15010499     | ZNF385B      | zinc finger protein 385B                                       | 2.49                                                                                     | 2.20E-07         |
| 14965576     | LOC100630218 | retina-specific copper amine oxidase-like                      | 2.38                                                                                     | 7.91E-09         |
| 15055175     | LOC100063599 | uncharacterized protein C21orf62-like                          | 2.34                                                                                     | 4.37E-08         |
| 15132912     | CAPN6        | calpain 6                                                      | 2.33                                                                                     | 0.000552         |
| 15017359     | FABP3        | fatty acid binding protein 3, muscle and heart (mammary-deri   | 2.25                                                                                     | 3.09E-06         |
| 14984135     | GCNT4        | glucosaminyl (N-acetyl) transferase 4, core 2                  | 2.19                                                                                     | 0.000302         |
| 15032357     | LOC100057208 | collagen alpha-1(IX) chain-like                                | 2.17                                                                                     | 1.05E-08         |
| 15124355     | TNFRSF11B    | tumor necrosis factor receptor superfamily, member 11b         | 2.16                                                                                     | 2.64E-05         |
| 15048016     | SPI2         | alpha-1-antitrypsin                                            | 2.15                                                                                     | 0.000409         |
| 15132343     | ---          | ---                                                            | 2.10                                                                                     | 1.71E-08         |
| 14957581     | MOXD1        | monooxygenase, DBH-like 1                                      | 1.97                                                                                     | 0.000157         |
| 14983481     | LOC100629522 | neuronal protein 3.1-like                                      | 1.97                                                                                     | 7.19E-08         |
| 15109872     | LOC100062824 | FXD domain-containing ion transport regulator 6-like           | 1.97                                                                                     | 1.50E-05         |
| 15065448     | LOC100055505 | c-type lectin domain family 3 member A-like                    | 1.94                                                                                     | 0.048277         |
| 15131515     | SLC9A7       | solute carrier family 9, subfamily A (NHE7, cation proton anti | 1.88                                                                                     | 9.16E-07         |
| 14955540     | LOC100063245 | cationic amino acid transporter 3-like                         | 1.86                                                                                     | 6.60E-05         |
| 15005285     | LECT1        | leukocyte cell derived chemotaxin 1                            | 1.86                                                                                     | 0.002065         |
| 15088442     | MCOLN2       | mucolin 2                                                      | 1.85                                                                                     | 6.46E-09         |
| 15002796     | FRY          | furry homolog (Drosophila)                                     | 1.83                                                                                     | 2.64E-05         |
| 15048020     | SPI2         | alpha-1-antitrypsin                                            | 1.82                                                                                     | 0.016596         |
| 15011413     | TIPARP       | TCDD-inducible poly(ADP-ribose) polymerase                     | 1.78                                                                                     | 1.47E-06         |
| 15002551     | LOC100050428 | gamma-sarcoglycan-like                                         | 1.78                                                                                     | 0.000578         |
| 14966312     | CHAD         | chondroadherin                                                 | 1.76                                                                                     | 0.006395         |
| 15120764     | MMP16        | matrix metalloproteinase 16 (membrane-inserted)                | 1.73                                                                                     | 3.18E-08         |
| 14950221     | MIA          | melanoma inhibitory activity                                   | 1.71                                                                                     | 0.038069         |
| 15031054     | COL11A2      | collagen, type XI, alpha 2                                     | 1.71                                                                                     | 5.19E-05         |
| 15025249     | TLL1         | tolloid-like 1                                                 | 1.70                                                                                     | 0.000118         |
| 15060207     | LOC100051709 | epiphygan-like                                                 | 1.68                                                                                     | 0.001446         |
| 15130699     | NLGN4X       | neuroligin 4, X-linked                                         | 1.68                                                                                     | 0.000684         |
| 15088822     | LOC100069195 | UDP-N-acetylglucosamine/UDP-glucose/GDP-mannose transp         | 1.67                                                                                     | 6.13E-07         |
| 15130082     | FHL1         | four and a half LIM domains 1                                  | 1.67                                                                                     | 0.000229         |
| 15087070     | ITGA10       | integrin, alpha 10                                             | 1.66                                                                                     | 2.06E-06         |
| 15094688     | LOC100064788 | EF-hand domain-containing protein D1-like                      | 1.64                                                                                     | 0.008017         |
| 14983889     | HAPLN1       | hyaluronan and proteoglycan link protein 1                     | 1.62                                                                                     | 0.000881         |
| 15131238     | ---          | ---                                                            | 1.61                                                                                     | 8.11E-06         |
| 15123161     | CRISPLD1     | cysteine-rich secretory protein LCCL domain containing 1       | 1.61                                                                                     | 0.017465         |
| 15089905     | GLT25D2      | glycosyltransferase 25 domain containing 2                     | 1.57                                                                                     | 0.00021          |
| 14997696     | ZNF385D      | zinc finger protein 385D                                       | 1.55                                                                                     | 6.35E-06         |
| 15087730     | SORT1        | sortilin 1                                                     | 1.55                                                                                     | 2.09E-06         |
| 15026446     | SGMS2        | sphingomyelin synthase 2                                       | 1.55                                                                                     | 0.000123         |
| 15060014     | ---          | ---                                                            | 1.55                                                                                     | 0.000824         |

|          |              |                                                              |      |          |
|----------|--------------|--------------------------------------------------------------|------|----------|
| 15056268 | PDGFRL       | platelet-derived growth factor receptor-like                 | 1.54 | 3.58E-05 |
| 14948020 | ---          | ---                                                          | 1.53 | 0.015604 |
| 15128808 | LOC100071749 | lysophosphatidic acid receptor 4-like                        | 1.53 | 0.000409 |
| 15112692 | LOC100055858 | lymphatic vessel endothelial hyaluronic acid receptor 1-like | 1.53 | 0.007997 |
| 15083077 | LOC100066648 | UPF0606 protein KIAA1549-like                                | 1.52 | 5.56E-06 |
| 15025502 | LOC100069704 | lecithin retinol acyltransferase-like                        | 1.52 | 0.01079  |
| 15034068 | ANKH         | ankylosis, progressive homolog (mouse)                       | 1.51 | 1.44E-08 |
| 15037507 | ACSS2        | acyl-CoA synthetase short-chain family member 2              | 1.50 | 8.61E-07 |
| 15045318 | LOC100051632 | proto-oncogene c-Fos-like                                    | 1.47 | 0.003365 |
| 15099719 | B4GALNT3     | beta-1,4-N-acetyl-galactosaminyl transferase 3               | 1.46 | 1.82E-08 |
| 15032433 | LOC100062102 | cytochrome P450 4F6-like                                     | 1.46 | 0.014499 |
| 15060007 | LOC100050683 | protein lin-7 homolog A-like                                 | 1.45 | 1.10E-06 |
| 14944988 | ACAN         | aggrecan                                                     | 1.45 | 0.004344 |
| 14952388 | ---          | ---                                                          | 1.44 | 0.00446  |
| 15033824 | C1QTNF3      | C1q and tumor necrosis factor related protein 3              | 1.43 | 0.000176 |
| 15068271 | LOC100070406 | probable serine protease HTRA3-like                          | 1.41 | 0.000579 |
| 15100707 | LOC100064029 | ras-related and estrogen-regulated growth inhibitor-like     | 1.40 | 0.041394 |
| 15065525 | PLCG2        | phospholipase C, gamma 2 (phosphatidylinositol-specific)     | 1.40 | 0.000961 |
| 14988094 | MGAT4A       | mannosyl (alpha-1,3-)-glycoprotein beta-1,4-N-acetylglucosar | 1.40 | 3.58E-05 |
| 14943625 | KCNMA1       | potassium large conductance calcium-activated channel, subf  | 1.39 | 0.000617 |
| 15101248 | CPNE8        | copine VIII                                                  | 1.39 | 0.006591 |
| 15068089 | LOC100056091 | heparan sulfate glucosamine 3-O-sulfotransferase 1-like      | 1.37 | 5.19E-05 |
| 15020022 | ---          | ---                                                          | 1.36 | 0.002051 |
| 15129618 | DOCK11       | dedicator of cytokinesis 11                                  | 1.36 | 3.25E-07 |
| 15011841 | LOC100058694 | UDP-GlcNAc:betaGal beta-1,3-N-acetylglucosaminyltransferas   | 1.35 | 0.00018  |
| 15101460 | SLC38A1      | solute carrier family 38, member 1                           | 1.34 | 0.001241 |
| 14942529 | PLCE1        | phospholipase C, epsilon 1                                   | 1.34 | 1.65E-05 |
| 15062229 | NEBL         | nebulette                                                    | 1.34 | 2.96E-05 |
| 15113149 | LGR4         | leucine-rich repeat containing G protein-coupled receptor 4  | 1.34 | 5.56E-06 |
| 15109741 | CADM1        | cell adhesion molecule 1                                     | 1.33 | 7.02E-07 |
| 15057330 | MTUS1        | microtubule associated tumor suppressor 1                    | 1.33 | 1.62E-09 |
| 15058996 | LOC100069841 | galectin-1-like                                              | 1.33 | 0.016945 |
| 15020024 | MFAP3L       | microfibrillar-associated protein 3-like                     | 1.33 | 0.027152 |
| 14947911 | LOC100059072 | protein NDRG2-like                                           | 1.32 | 5.37E-05 |
| 14961882 | LOC100630810 | protein EVI2A-like                                           | 1.32 | 0.001377 |
| 15078554 | LOC100071386 | uncharacterized protein C7orf58-like                         | 1.31 | 0.003112 |
| 15121168 | LOC100052149 | myb-related protein A-like                                   | 1.31 | 0.006717 |
| 15100712 | EPS8         | epidermal growth factor receptor pathway substrate 8         | 1.31 | 0.000651 |
| 15070860 | LOC100059394 | annexin A3-like                                              | 1.30 | 0.001241 |
| 15001201 | LOC100054279 | CTD small phosphatase-like protein-like                      | 1.30 | 0.000312 |
| 15072360 | LOC100069932 | cytokine-like protein 1-like                                 | 1.29 | 4.88E-05 |
| 15029938 | MBOAT1       | membrane bound O-acyltransferase domain containing 1         | 1.29 | 0.002918 |
| 15029485 | KCNQ5        | potassium voltage-gated channel, KQT-like subfamily, membe   | 1.29 | 0.003173 |
| 15042703 | MIR24-2      | microRNA mir-24-2                                            | 1.29 | 0.016366 |
| 15056706 | CSGALNACT1   | chondroitin sulfate N-acetylgalactosaminyltransferase 1      | 1.29 | 0.000531 |
| 14988421 | LOC100051931 | fibulin-7-like                                               | 1.28 | 0.001875 |
| 15134820 | ---          | ---                                                          | 1.27 | 0.014725 |
| 15025369 | FNIP2        | folliculin interacting protein 2                             | 1.26 | 5.33E-08 |
| 15067748 | TLR1         | toll-like receptor 1                                         | 1.25 | 0.018635 |
| 15086341 | THBS3        | thrombospondin 3                                             | 1.23 | 0.000121 |
| 14936354 | SYNM         | synemin, intermediate filament protein                       | 1.23 | 1.82E-08 |
| 15121868 | MATN2        | matrilin 2                                                   | 1.22 | 0.042942 |
| 14978242 | ---          | ---                                                          | 1.22 | 0.000128 |
| 15103108 | LRIG3        | leucine-rich repeats and immunoglobulin-like domains 3       | 1.21 | 0.00032  |
| 15134766 | ---          | ---                                                          | 1.21 | 0.001241 |
| 15029596 | SLC22A23     | solute carrier family 22, member 23                          | 1.21 | 0.001189 |
| 14968944 | PMP22        | peripheral myelin protein 22                                 | 1.20 | 0.00452  |
| 15088956 | FMOD         | fibromodulin                                                 | 1.20 | 9.44E-05 |
| 14997534 | OSBPL10      | oxysterol binding protein-like 10                            | 1.20 | 0.000409 |
| 15055305 | ERG          | v-ets erythroblastosis virus E26 oncogene homolog (avian)    | 1.20 | 0.00017  |
| 15105167 | GRAMD1B      | GRAM domain containing 1B                                    | 1.19 | 0.000997 |
| 15033420 | HMGCS1       | 3-hydroxy-3-methylglutaryl-CoA synthase 1 (soluble)          | 1.18 | 0.000128 |
| 15080042 | LOC100065774 | insulin-induced gene 1 protein-like                          | 1.18 | 0.000174 |

|          |                   |                                                                     |       |          |
|----------|-------------------|---------------------------------------------------------------------|-------|----------|
| 15076439 | GPR126            | G protein-coupled receptor 126                                      | 1.18  | 0.000118 |
| 14942165 | LOC100060384      | sideroflexin-3-like                                                 | 1.17  | 0.000527 |
| 15086701 | S100A10           | S100 calcium binding protein A10                                    | 1.16  | 0.003187 |
| 15040296 | LOC100070046      | protein-glutamine gamma-glutamyltransferase 2-like                  | 1.16  | 0.002255 |
| 15123755 | RUNX1T1           | runt-related transcription factor 1; translocated to, 1 (cyclin D1) | 1.16  | 0.001241 |
| 15087870 | LOC100049922      | collagen alpha-1(XI) chain-like                                     | 1.16  | 2.73E-05 |
| 15043047 | GCNT1             | glucosaminyl (N-acetyl) transferase 1, core 2                       | 1.15  | 0.030401 |
| 15095563 | LOC100059512      | CD9 antigen-like                                                    | 1.15  | 0.00013  |
| 15016660 | COL9A2            | collagen, type IX, alpha 2                                          | 1.15  | 0.000577 |
| 15056348 | SORBS2            | sorbin and SH3 domain containing 2                                  | 1.14  | 0.002085 |
| 14936844 | CSPG4             | chondroitin sulfate proteoglycan 4                                  | 1.13  | 0.005221 |
| 15124214 | SYBU              | syntabulin (syntaxin-interacting)                                   | 1.13  | 0.000857 |
| 15107590 | PPFIBP2           | PTPRF interacting protein, binding protein 2 (liprin beta 2)        | 1.13  | 0.002051 |
| 14951600 | LOC100062591      | myeloid-associated differentiation marker-like                      | 1.12  | 0.003421 |
| 15076160 | LOC100063776      | uncharacterized LOC100063776                                        | 1.11  | 0.037043 |
| 15066229 | UNC5C             | unc-5 homolog C (C. elegans)                                        | 1.11  | 0.020339 |
| 15042705 | MIR27B            | microRNA mir-27b                                                    | 1.10  | 0.000384 |
| 15109786 | LOC100062583      | apolipoprotein A-I-like                                             | 1.10  | 0.005269 |
| 14952379 | NT5E              | 5'-nucleotidase, ecto (CD73)                                        | 1.10  | 0.014529 |
| 15082993 | LOC100064880      | pleiotrophin-like                                                   | 1.10  | 0.019624 |
| 15041774 | DOCK8             | dedicator of cytokinesis 8                                          | 1.10  | 0.000785 |
| 15042707 | MIR23B            | microRNA mir-23b                                                    | 1.10  | 0.00688  |
| 15003944 | ITGBL1            | integrin, beta-like 1 (with EGF-like repeat domains)                | 1.10  | 0.00392  |
| 15094718 | ECA.9094          | ---                                                                 | 1.09  | 0.000316 |
| 15109637 | LOC100061921      | alpha-crystallin B chain-like                                       | 1.09  | 0.002065 |
| 15129254 | LOC100054959      | nik-related protein kinase-like                                     | 1.09  | 0.001084 |
| 15106952 | CHRD12            | chordin-like 2                                                      | 1.09  | 0.001755 |
| 15087098 | ANKRD35           | ankyrin repeat domain 35                                            | 1.09  | 0.003441 |
| 15007745 | GULP1             | GULP, engulfment adaptor PTB domain containing 1                    | 1.08  | 0.004162 |
| 15067694 | UGDH              | UDP-glucose 6-dehydrogenase                                         | 1.08  | 0.000183 |
| 15032998 | CILP2             | cartilage intermediate layer protein 2                              | 1.08  | 0.021571 |
| 14945271 | MTMR10            | myotubularin related protein 10                                     | 1.08  | 1.65E-05 |
| 14953260 | ENPP1             | ectonucleotide pyrophosphatase/phosphodiesterase 1                  | 1.08  | 0.000552 |
| 15014360 | LEPREL1           | leprecan-like 1                                                     | 1.08  | 0.018635 |
| 15021265 | LOC100066893      | long-chain specific acyl-CoA dehydrogenase, mitochondrial-like      | 1.08  | 0.000407 |
| 14945363 | ATP10A            | ATPase, class V, type 10A                                           | 1.07  | 8.14E-05 |
| 14978240 | GPBR              | G protein-coupled estrogen receptor 1                               | 1.07  | 0.041042 |
| 15081436 | SAMD9             | sterile alpha motif domain containing 9                             | 1.06  | 0.016262 |
| 15021113 | LOC100072829      | elongation of very long chain fatty acids protein 6-like            | 1.06  | 0.031119 |
| 14985920 | LOC100072674      | transforming growth factor-beta-induced protein ig-h3-like          | 1.06  | 0.009179 |
| 14937952 | LOC100069087      | protogenin-like                                                     | 1.05  | 0.000306 |
| 14942909 | PAPSS2            | 3'-phosphoadenosine 5'-phosphosulfate synthase 2                    | 1.05  | 0.005598 |
| 15124687 | KCNQ3             | potassium voltage-gated channel, KQT-like subfamily, member 3       | 1.05  | 0.008914 |
| 15045332 | LOC100058017      | feline leukemia virus subgroup C receptor-related protein 2-like    | 1.05  | 0.011163 |
| 15029199 | LRRC1             | leucine rich repeat containing 1                                    | 1.04  | 0.000251 |
| 14974218 | DHCR7             | 7-dehydrocholesterol reductase                                      | 1.03  | 5.84E-05 |
| 15081344 | LOC100050921      | lanosterol 14-alpha demethylase-like                                | 1.02  | 0.000158 |
| 14982786 | LOC100072589      | GDNF family receptor alpha-3-like                                   | 1.02  | 0.004344 |
| 15015733 | DHCR24            | 24-dehydrocholesterol reductase                                     | 1.02  | 0.014896 |
| 15044134 | PTPDC1            | protein tyrosine phosphatase domain containing 1                    | 1.02  | 0.015224 |
| 14974621 | LOC100062881      | brain-specific angiogenesis inhibitor 1-associated protein 2-like   | 1.02  | 0.028914 |
| 14988856 | LOXL3             | lysyl oxidase-like 3                                                | 1.02  | 0.000855 |
| 15088208 | TGFB3             | transforming growth factor, beta receptor III                       | 1.00  | 0.000345 |
| 15132674 | LOC100060746      | armadillo repeat-containing X-linked protein 2-like                 | 1.00  | 0.000689 |
| 14936200 | MFGE8             | milk fat globule-EGF factor 8 protein                               | 1.00  | 0.001102 |
| 15071093 | CXCL6             | chemokine (C-X-C motif) ligand 6                                    | -7.25 | 1.10E-17 |
| 15109357 | MMP1              | matrix metalloproteinase 1 (interstitial collagenase)               | -7.00 | 8.41E-18 |
| 15094462 | LOC100629808      | c-C motif chemokine 20-like                                         | -5.34 | 1.48E-16 |
| 14946865 | NMES1             | normal mucosa of esophagus-specific gene 1 protein                  | -5.07 | 7.13E-14 |
| 15108043 | SAA // LOC1000567 | serum amyloid A1 // serum amyloid A protein-like // serum amyloid A | -5.01 | 1.56E-12 |
| 15109386 | MMP13             | matrix metalloproteinase 13 (collagenase 3)                         | -4.69 | 2.47E-11 |
| 15109367 | MMP3              | matrix metalloproteinase 3 (stromelysin 1, progelatinase)           | -4.51 | 8.48E-10 |
| 15071082 | ECA.13530         | ---                                                                 | -4.37 | 1.58E-08 |

|          |              |                                                                   |       |          |
|----------|--------------|-------------------------------------------------------------------|-------|----------|
| 15113003 | SAA          | serum amyloid A1                                                  | -4.22 | 1.20E-17 |
| 15108047 | SAA1         | serum amyloid A1                                                  | -4.02 | 2.60E-17 |
| 15112997 | SAA1         | serum amyloid A1                                                  | -4.01 | 1.39E-14 |
| 14966729 | LOC100071384 | carbonic anhydrase 4-like                                         | -3.95 | 1.71E-06 |
| 14967223 | INOS         | inducible nitric oxide synthase                                   | -3.83 | 4.09E-08 |
| 15011434 | PTX3         | pentraxin 3, long                                                 | -3.81 | 1.52E-10 |
| 15018127 | SPLA2        | secretory phospholipase A2                                        | -3.73 | 4.06E-06 |
| 15112999 | SAA1         | serum amyloid A1                                                  | -3.68 | 9.11E-15 |
| 15134370 | ---          | ---                                                               | -3.43 | 1.69E-15 |
| 15071075 | CXCL1        | chemokine (C-X-C motif) ligand 1 (melanoma growth stimulat        | -3.28 | 2.20E-06 |
| 15077930 | IL6          | interleukin 6 (interferon, beta 2)                                | -3.19 | 0.00033  |
| 15027736 | CFB          | complement factor B                                               | -3.13 | 0.000159 |
| 15038136 | LOC100056125 | elafin-like                                                       | -2.83 | 0.000394 |
| 14991538 | IL-1RII      | interleukin-1 receptor type II                                    | -2.63 | 3.02E-06 |
| 15098538 | IGFBP-5      | insulin-like growth factor binding protein-5                      | -2.58 | 0.000229 |
| 14943027 | ANK3         | ankyrin 3, node of Ranvier (ankyrin G)                            | -2.45 | 0.000409 |
| 15071098 | IL8          | interleukin 8                                                     | -2.36 | 0.015224 |
| 15054932 | ADAMT5       | ADAM metalloproteinase with thrombospondin type 1 motif, 5        | -2.32 | 1.22E-08 |
| 15124168 | ANGPT1       | angiopoietin 1                                                    | -2.28 | 0.000268 |
| 15109378 | LOC100069047 | macrophage metalloelastase-like                                   | -2.25 | 0.006395 |
| 15113767 | LOC100629131 | leukemia inhibitory factor-like                                   | -2.24 | 0.000961 |
| 15104093 | BIRC3        | baculoviral IAP repeat containing 3                               | -2.17 | 0.001215 |
| 14986309 | ---          | ---                                                               | -2.16 | 2.43E-07 |
| 15092613 | VCAM         | vascular cell adhesion molecule                                   | -2.14 | 0.00134  |
| 14953386 | TNFAIP3      | tumor necrosis factor, alpha-induced protein 3                    | -2.11 | 1.53E-07 |
| 15128105 | LOC100146482 | ferritin heavy chain-like                                         | -2.04 | 2.83E-06 |
| 14966992 | CCL2         | chemokine (C-C motif) ligand 2                                    | -2.04 | 8.81E-09 |
| 15022470 | LOC100069173 | ribonuclease ZC3H12A-like                                         | -2.03 | 5.33E-08 |
| 14990082 | LOC100070088 | cytochrome P450 1B1-like                                          | -1.98 | 7.02E-09 |
| 15077811 | ITGB8        | integrin, beta 8                                                  | -1.94 | 0.001161 |
| 14995550 | LOC100056410 | calcium-dependent secretion activator 1-like                      | -1.94 | 8.07E-05 |
| 15003404 | ENOX1        | ecto-NOX disulfide-thiol exchanger 1                              | -1.93 | 5.66E-10 |
| 15057122 | NRG1         | neuregulin 1                                                      | -1.92 | 0.001357 |
| 15020907 | LOC100072294 | TNFAIP3-interacting protein 3-like                                | -1.83 | 2.14E-05 |
| 15075712 | SOD2         | superoxide dismutase 2, mitochondrial                             | -1.80 | 9.07E-10 |
| 14973391 | ---          | ---                                                               | -1.80 | 0.014697 |
| 15012507 | TFRC         | transferrin receptor (p90, CD71)                                  | -1.79 | 3.85E-07 |
| 15052916 | PTGES        | prostaglandin E synthase                                          | -1.78 | 3.75E-05 |
| 14937648 | CA12         | carbonic anhydrase XII                                            | -1.76 | 0.028355 |
| 15006746 | TSG-6        | tumor necrosis factor alpha-induced protein 6                     | -1.76 | 2.67E-05 |
| 15100843 | ABCC9        | ATP-binding cassette, sub-family C (CFTR/MRP), member 9           | -1.75 | 0.00788  |
| 15095888 | A2ML1        | alpha-2-macroglobulin-like 1                                      | -1.75 | 0.00134  |
| 14934217 | UBE2D1       | ubiquitin-conjugating enzyme E2D 1                                | -1.73 | 1.07E-08 |
| 15098024 | SLC16A7      | solute carrier family 16, member 7 (monocarboxylic acid tran      | -1.72 | 0.021348 |
| 14941712 | ADRA2A       | adrenoceptor alpha 2A                                             | -1.71 | 6.79E-06 |
| 14932983 | GPAM         | glycerol-3-phosphate acyltransferase, mitochondrial               | -1.70 | 5.25E-08 |
| 15088003 | DPYD         | dihydropyrimidine dehydrogenase                                   | -1.70 | 1.71E-06 |
| 15056255 | LOC100050240 | low affinity cationic amino acid transporter 2-like               | -1.66 | 2.87E-09 |
| 15022310 | MFSD2A       | major facilitator superfamily domain containing 2A                | -1.65 | 1.63E-06 |
| 15076505 | ---          | ---                                                               | -1.64 | 0.000158 |
| 15089848 | LOC100051514 | regulator of G-protein signaling 16-like                          | -1.62 | 0.000123 |
| 15035773 | SLC1A3       | solute carrier family 1 (glial high affinity glutamate transporte | -1.61 | 4.61E-09 |
| 15121005 | MSC          | musculin                                                          | -1.59 | 1.41E-05 |
| 15108234 | LOC100057503 | growth arrest-specific protein 2-like                             | -1.56 | 3.01E-05 |
| 15052198 | LOC100051061 | tumor necrosis factor ligand superfamily member 8-like            | -1.55 | 0.001011 |
| 14969771 | ---          | ---                                                               | -1.54 | 6.53E-08 |
| 14948692 | ---          | ---                                                               | -1.53 | 8.61E-07 |
| 15045643 | SLC24A4      | solute carrier family 24 (sodium/potassium/calcium exchange       | -1.51 | 0.004024 |
| 15040476 | LOC100070934 | syndecan-4-like                                                   | -1.50 | 0.000372 |
| 15064092 | MMP2         | matrix metalloproteinase 2 (gelatinase A, 72kDa gelatinase, 72    | -1.45 | 7.19E-08 |
| 15091633 | ECM1         | extracellular matrix protein 1                                    | -1.44 | 0.004149 |
| 15042675 | FTH1         | ferritin, heavy polypeptide 1                                     | -1.41 | 9.57E-09 |
| 15050171 | LOC100069960 | paired mesoderm homeobox protein 2-like                           | -1.39 | 3.67E-05 |

|          |              |                                                                 |       |          |
|----------|--------------|-----------------------------------------------------------------|-------|----------|
| 15090286 | LOC100056475 | g0/G1 switch regulatory protein 2-like                          | -1.37 | 0.013352 |
| 15123176 | LOC100060330 | peptidase inhibitor 15-like                                     | -1.36 | 0.019668 |
| 15052048 | LOC100056842 | thymic stromal cotransporter homolog                            | -1.34 | 0.001238 |
| 14990733 | LOC100071618 | quinone oxidoreductase PIG3-like                                | -1.34 | 0.01695  |
| 14973160 | FTH1         | ferritin, heavy polypeptide 1                                   | -1.34 | 2.09E-06 |
| 15044115 | LOC100061893 | sphingosine 1-phosphate receptor 3-like                         | -1.32 | 0.003173 |
| 14952871 | LOC100072561 | ---                                                             | -1.29 | 0.00256  |
| 14993281 | EPAS1        | endothelial PAS domain protein 1                                | -1.28 | 0.006938 |
| 14981772 | SLIT3        | slit homolog 3 (Drosophila)                                     | -1.28 | 0.025473 |
| 14957413 | ---          | ---                                                             | -1.26 | 0.0089   |
| 15009044 | ZEB2         | zinc finger E-box binding homeobox 2                            | -1.26 | 6.29E-05 |
| 15093253 | PTGFR        | prostaglandin F receptor (FP)                                   | -1.23 | 0.001694 |
| 15120926 | JPH1         | junctophilin 1                                                  | -1.22 | 0.004804 |
| 15063666 | PFKFB3       | 6-phosphofructo-2-kinase/fructose-2,6-biphosphatase 3           | -1.22 | 0.003062 |
| 15108935 | LOC100060539 | complement C3-like                                              | -1.22 | 0.025998 |
| 15017191 | RNF19B       | ring finger protein 19B                                         | -1.21 | 8.76E-10 |
| 15024271 | PIK3CD       | phosphatidylinositol-4,5-bisphosphate 3-kinase, catalytic sub   | -1.20 | 0.000295 |
| 15120932 | ---          | ---                                                             | -1.20 | 0.011022 |
| 15085328 | LOC100056564 | laminin subunit beta-3-like                                     | -1.16 | 0.016482 |
| 15112034 | LOC100052723 | folate receptor beta-like                                       | -1.16 | 8.28E-05 |
| 15031833 | ENPP5        | ectonucleotide pyrophosphatase/phosphodiesterase 5 (putat       | -1.16 | 0.036248 |
| 15054120 | KCNJ15       | potassium inwardly-rectifying channel, subfamily J, member 1    | -1.15 | 0.000859 |
| 15054158 | BACE2        | beta-site APP-cleaving enzyme 2                                 | -1.14 | 5.02E-07 |
| 15076510 | LOC100056814 | membrane-associated guanylate kinase, WW and PDZ domain         | -1.12 | 0.002892 |
| 15075229 | ---          | ---                                                             | -1.12 | 4.88E-05 |
| 15114454 | TBX3         | T-box 3                                                         | -1.11 | 0.000298 |
| 15005444 | LOC100052476 | uncharacterized LOC100052476                                    | -1.11 | 0.005044 |
| 15089727 | LOC100055750 | retinoic acid receptor responder protein 1-like                 | -1.10 | 0.016488 |
| 15111156 | ICAM1        | intercellular adhesion molecule 1                               | -1.09 | 0.002291 |
| 14980417 | LOC100629909 | vasorin-like                                                    | -1.07 | 2.50E-05 |
| 15010628 | LOC100068873 | tissue factor pathway inhibitor-like                            | -1.05 | 0.025998 |
| 15004775 | ---          | ---                                                             | -1.04 | 0.003173 |
| 15019483 | LOC100057232 | zinc transporter ZIP14-like                                     | -1.04 | 0.000165 |
| 15101954 | SLC11A2      | solute carrier family 11 (proton-coupled divalent metal ion tra | -1.04 | 0.011768 |
| 15076507 | ---          | ---                                                             | -1.02 | 0.01079  |
| 15081700 | ETV1         | ets variant 1                                                   | -1.01 | 0.009348 |
| 15075002 | ---          | ---                                                             | -1.01 | 2.79E-06 |
| 15107741 | AMPD3        | adenosine monophosphate deaminase 3                             | -1.01 | 0.039563 |
