# Supplementary material for: Conditioned serum in vitro treatment of chondrocyte pellets and osteoarthritic explants
Source: PubMed Central journal article supplement — Equine Vet J. 2022 Jun 6;55(2):325–35. doi: 10.1111/evj.13582 (PMC10084271; doi:10.1111/evj.13582), 2022-06-06
Supplement: EVJ-55-325-s005.pdf [file EVJ-55-325-s005.pdf]

**Table S1:** Matrixmetallopeptidase-13 (MMP-13) concentration in the media from unstimulated pellets, untreated controls (interleukin (IL)-1 $\beta$ -stimulated pellets), and pellets treated with pooled serum (PS), pooled serum incubated for 24 h (PS24h), or pooled conditioned serum (PCS) sampled after 2 and 48 h. Values are presented as mean  $\pm$  standard deviation (SD) and *p* values for all treatments were compared against untreated controls at each time point. Results were considered statistically significant at *p* < 0.05, n = 5.

|                                   | 2 h                         |                 | 48 h                        |                 |
|-----------------------------------|-----------------------------|-----------------|-----------------------------|-----------------|
|                                   | MMP-13 (ng/pellet) $\pm$ SD | <i>p</i> -value | MMP-13 (ng/pellet) $\pm$ SD | <i>p</i> -value |
| Unstimulated                      | 0.0165 $\pm$ 0.0163         | 0.7592          | 0.0260 $\pm$ 0.0269         | 0.0228          |
| Untreated control (IL-1 $\beta$ ) | 0.540 $\pm$ 0.381           |                 | 3.99 $\pm$ 3.44             |                 |
| IL-1 $\beta$ + PS                 | 0.767 $\pm$ 0.712           | 0.8938          | 6.07 $\pm$ 4.00             | 0.2251          |
| IL-1 $\beta$ + PS24h              | 0.632 $\pm$ 0.419           | 0.9569          | 6.47 $\pm$ 4.17             | 0.1491          |
| IL-1 $\beta$ + PCS                | 0.558 $\pm$ 0.406           | 0.9913          | 5.86 $\pm$ 4.04             | 0.2747          |
