# Supplementary material for: Conditioned serum in vitro treatment of chondrocyte pellets and osteoarthritic explants
Source: PubMed Central journal article supplement — Equine Vet J. 2022 Jun 6;55(2):325–35. doi: 10.1111/evj.13582 (PMC10084271; doi:10.1111/evj.13582), 2022-06-06
Supplement: EVJ-55-325-s006.pdf [file EVJ-55-325-s006.pdf]

**Table S6:** Gene expression in pellets treated with pooled serum (PS), pooled serum incubated for 24 h (PS24h), and pooled conditioned serum (PCS) compared with that in untreated controls (interleukin (IL)-1 $\beta$ -stimulated pellets) after 48 h. Genes were grouped based on significantly downregulated expression in the treatment groups.

| Gene symbol                               | Gene name                                                                                            | Probe set ID | PS Log2 FC | PS24h Log2 FC | PCS Log2 FC |
|-------------------------------------------|------------------------------------------------------------------------------------------------------|--------------|------------|---------------|-------------|
| <b>Downregulated in PS, PS24h and PCS</b> |                                                                                                      |              |            |               |             |
| LOC100055505                              | c-type lectin domain family 3 member A-like                                                          | 15065448     | -4.18      | -3.58         | -3.94       |
| GLT25D2                                   | glycosyltransferase 25 domain containing 2                                                           | 15089905     | -2.22      | -2.11         | -2.18       |
| STC2                                      | stanniocalcin 2                                                                                      | 14981678     | -1.74      | -1.68         | -1.50       |
| LOC100056564                              | laminin subunit beta-3-like                                                                          | 15085328     | -1.59      | -1.34         | -1.30       |
| ACAN                                      | aggrecan                                                                                             | 14944988     | -1.54      | -1.34         | -1.55       |
| NEDD4                                     | neural precursor cell expressed, developmentally down-regulated 4, E3 ubiquitin protein ligase       | 14937947     | -1.45      | -1.27         | -1.13       |
| LOC100063599                              | uncharacterised protein C21orf62-like                                                                | 15055175     | -1.39      | -1.56         | -1.22       |
| MAMDC2                                    | MAM domain containing 2                                                                              | 15043206     | -1.27      | -1.13         | -1.25       |
| ITIH5                                     | inter-alpha-trypsin inhibitor heavy chain family, member 5                                           | 15062615     | -1.15      | -1.38         | -1.24       |
| <b>Downregulated in PS</b>                |                                                                                                      |              |            |               |             |
| PSAT1                                     | phosphoserine aminotransferase 1                                                                     | 15042943     | -2.22      | -0.67         | -1.43       |
| ---                                       | ---                                                                                                  | 15081575     | -2.10      | -0.80         | -1.24       |
| ITGA6                                     | integrin, alpha 6                                                                                    | 15007322     | -1.94      | -1.28         | -1.54       |
| POSTN                                     | periostin, osteoblast specific factor                                                                | 15004827     | -1.93      | -1.22         | -1.12       |
| HAPLN1                                    | hyaluronan and proteoglycan link protein 1                                                           | 14983889     | -1.59      | -0.87         | -0.93       |
| MTHFD2                                    | methylenetetrahydrofolate dehydrogenase (NADP+ dependent) 2, methenyltetrahydrofolate cyclohydrolase | 14992447     | -1.47      | -0.75         | -1.19       |
| PFN2                                      | profilin 2                                                                                           | 15002259     | -1.36      | -0.66         | -0.93       |
| LOC100057932                              | transmembrane protein 56-like                                                                        | 15092785     | -1.35      | -0.90         | -0.94       |
| TLL1                                      | tolloid-like 1                                                                                       | 15025249     | -1.33      | -0.36         | -0.87       |
| ---                                       | ---                                                                                                  | 15131498     | -1.28      | -0.48         | -0.35       |
| ALDH1L2                                   | aldehyde dehydrogenase 1 family, member L2                                                           | 15060654     | -1.25      | -0.69         | -1.13       |
| LOC100051061                              | tumour necrosis factor ligand superfamily member 8-like                                              | 15052198     | -1.21      | -1.04         | -0.85       |
| TNC                                       | tenascin C                                                                                           | 15052202     | -1.16      | -0.82         | -0.70       |
| SLC7A5                                    | solute carrier family 7 (amino acid transporter light chain, L system), member 5                     | 15070053     | -1.16      | -0.17         | -0.72       |
| SRPX2                                     | sushi-repeat containing protein, X-linked 2                                                          | 15129034     | -1.12      | -0.39         | -0.45       |
| LOC100629684                              | transmembrane protein 216-like                                                                       | 14970392     | -1.10      | -0.40         | -0.41       |
| ALG9                                      | asparagine-linked glycosylation 9, alpha-1,2-mannosyltransferase homolog (S. cerevisiae)             | 15109616     | -1.09      | -0.10         | -0.20       |
| LOC100059512                              | CD9 antigen-like                                                                                     | 15095563     | -1.08      | -0.56         | -0.70       |
| LOC100060950                              | protein ARV1-like                                                                                    | 14944212     | -1.08      | -0.10         | -0.35       |
| PMP22                                     | peripheral myelin protein 22                                                                         | 14968944     | -1.07      | -0.88         | -0.81       |
| ---                                       | ---                                                                                                  | 14999903     | -1.05      | -0.24         | -0.61       |
| LOC100051514                              | regulator of G-protein signaling 16-like                                                             | 15089848     | -1.03      | -1.04         | -0.80       |

|                                       |                                                                           |          |       |       |       |
|---------------------------------------|---------------------------------------------------------------------------|----------|-------|-------|-------|
| MCOLN2                                | mucolipin 2                                                               | 15088442 | -1.03 | -0.80 | -0.80 |
| LOC100055408                          | cell growth regulator with EF hand domain protein 1-like                  | 14990510 | -1.02 | -0.76 | -0.69 |
| LOC100061297                          | phosphoserine phosphatase-like                                            | 14975768 | -1.02 | -0.23 | -0.27 |
| ---                                   | ---                                                                       | 15008651 | -1.00 | -0.79 | -0.95 |
| <b>Downregulated in PS24h</b>         |                                                                           |          |       |       |       |
| LOC100630858                          | metallothionein-2-like                                                    | 15064176 | -1.64 | -2.57 | -1.34 |
| VIT                                   | vitrin                                                                    | 14993530 | -1.37 | -2.44 | -1.64 |
| ---                                   | ---                                                                       | 15129024 | -1.07 | -1.30 | -1.05 |
| LOC100053452                          | 1,25-dihydroxyvitamin D(3) 24-hydroxylase, mitochondrial-like             | 15040889 | -0.80 | -1.09 | -0.93 |
| PLCE1                                 | phospholipase C, epsilon 1                                                | 14942529 | -0.97 | -1.06 | -0.98 |
| ---                                   | ---                                                                       | 14936629 | 0.03  | -1.05 | -0.25 |
| <b>Downregulated in PCS</b>           |                                                                           |          |       |       |       |
| MIR140                                | microRNA mir-140                                                          | 15065031 | -0.72 | -0.75 | -1.15 |
| PHGDH                                 | phosphoglycerate dehydrogenase                                            | 15091893 | -0.72 | -0.92 | -1.13 |
| GPT2                                  | glutamic pyruvate transaminase (alanine aminotransferase) 2               | 15063835 | -0.93 | -0.99 | -1.02 |
| <b>Downregulated in PS and PCS</b>    |                                                                           |          |       |       |       |
| SLC40A1                               | solute carrier family 40 (iron-regulated transporter), member 1           | 15010682 | -1.48 | -0.97 | -1.07 |
| LOC100057735                          | dermatopontin-like                                                        | 15089332 | -1.46 | -0.92 | -1.22 |
| LOC100059936                          | delta-sarcoglycan-like                                                    | 14985066 | -1.43 | -0.91 | -1.14 |
| SLC6A9                                | solute carrier family 6 (neurotransmitter transporter, glycine), member 9 | 15016482 | -1.25 | -0.85 | -1.12 |
| <b>Downregulated in PS24h and PCS</b> |                                                                           |          |       |       |       |
| SCX                                   | scleraxis                                                                 | 15122858 | -0.93 | -1.20 | -1.09 |
| PDZD2                                 | PDZ domain containing 2                                                   | 15035933 | -0.86 | -1.16 | -1.25 |
| COL11A2                               | collagen, type XI, alpha 2                                                | 15031054 | -0.85 | -1.09 | -1.08 |
| LOC100049922                          | collagen alpha-1(XI) chain-like                                           | 15087870 | -0.92 | -1.01 | -1.01 |
| LOC100050257                          | inhibin beta E chain-like                                                 | 15097846 | -0.79 | -1.00 | -1.34 |

---, probe set ID without known gene name
